# Supplementary material
Source: publisher figshare collection journal article supplement (https://frontiersin.figshare.com/ndownloader/files/17947913)
Supplement: Supplementary file 1 [file 17947913]

## Supplementary Material

### 1 Supplementary Table S1

Legend for Table S1:

| Stages along food chain or sectors |                                                           |
|------------------------------------|-----------------------------------------------------------|
| A                                  | primary production: Agricultural production and fisheries |
| S                                  | Storage, processing and packaging                         |
| R                                  | Retail and wholesale                                      |
| P                                  | Private households                                        |
| O                                  | Out of home sector                                        |
| L                                  | Legislation - government                                  |

  

| Actors involved in the measure <sup>1</sup> |                             |
|---------------------------------------------|-----------------------------|
| x                                           | Main (cooperating) actors   |
| o                                           | Indirectly concerned actors |

**Supplementary Table S 1.** Food waste prevention measures in literature.

|              | A | S | R | P | O | L | Focus                                 | Measure                                                                                                                                                                                                                | Source                                                                                                                                                                             |
|--------------|---|---|---|---|---|---|---------------------------------------|------------------------------------------------------------------------------------------------------------------------------------------------------------------------------------------------------------------------|------------------------------------------------------------------------------------------------------------------------------------------------------------------------------------|
| <sup>1</sup> | x |   |   |   |   |   | Physical and biological contamination | Good practices in crop and animal production: avoiding damage or physical contamination by extraneous materials, pests, insects or vermin, and biological contamination by mould, pathogenic bacteria or viruses       | (HLPE, 2014)                                                                                                                                                                       |
| <sup>2</sup> | x |   |   |   |   |   | Fisheries                             | Fisheries: discard ban                                                                                                                                                                                                 | (Teuber and Jensen, 2016)                                                                                                                                                          |
| <sup>3</sup> | x |   | x |   |   |   | Imperfect produce                     | Markets for lower quality fruits and vegetables; alternative marketing channels; shorter chains (eg farmers' markets) to pass by the retail quality standards; discounts for imperfect produce in regular supermarkets | (Gustavsson et al., 2011)<br>(ReFED, 2016a)<br>(Göbel et al., 2012)<br>(Lipinski et al., 2017)<br>(Ribeiro et al., 2018)                                                           |
| <sup>4</sup> | x | x | x | x |   | x | Imperfect produce                     | Revise aesthetic requirements for fruit and vegetables; change marketing standards; sensitise consumers; increase consumer acceptance for imperfect produce; "gleaning" of unharvested produce                         | (FAO, 2013)<br>(Gustavsson et al., 2011)<br>(Hermsdorf et al., 2017)<br>(Hegnsholt et al., 2018)<br>(Lipinski et al., 2017)<br>(Teuber and Jensen, 2016)<br>(Priefer et al., 2016) |

<sup>1</sup> Identification of actors involved is based on what is mentioned in literature; if no (indirect) actors are listed, this does not mean they are not involved, it only means literature did not explicitly list them as being involved

|    | A | S | R | P | O | L | Focus                                          | Measure                                                                                                                                                                                                                                                                      | Source                                                                                                                                                                  |
|----|---|---|---|---|---|---|------------------------------------------------|------------------------------------------------------------------------------------------------------------------------------------------------------------------------------------------------------------------------------------------------------------------------------|-------------------------------------------------------------------------------------------------------------------------------------------------------------------------|
|    |   |   |   |   |   |   |                                                |                                                                                                                                                                                                                                                                              | (FAO, 2013)<br>(HLPE, 2014)                                                                                                                                             |
| 5  |   | x | x |   |   | x | Deviant products                               | Develop markets for ‘sub-standard’ products such as trimmings, products with deviant size, shape or with production errors (with no effect on safety, taste, nutritional value)                                                                                              | (Gustavsson et al., 2011)<br>(Priefer et al., 2016)<br>(FAO, 2013)<br>(Aschemann-Witzel et al., 2015)                                                                   |
| 6  | x |   |   |   |   |   | Technologies - agriculture                     | Advanced technologies: breeding more robust crop and animal species; develop less damaging cultivation and harvest methods; improve postharvest technologies and storage; early warning systems                                                                              | (Teuber and Jensen, 2016)<br>(Göbel et al., 2012)<br>(Lipinski et al., 2017)                                                                                            |
| 7  | x |   |   |   |   |   | Communication & cooperation                    | Communication and cooperation among farmers; reduce risk of overproduction by allowing surplus crops from one farm to solve a shortage of crops on another                                                                                                                   | (Gustavsson et al., 2011)<br>(Göbel et al., 2012)                                                                                                                       |
| 8  | x | x | x |   | x |   | Communication & cooperation                    | Integrated supply chain management; improve communication and organization to match demand and supply of food; partnerships to manage seasonal variability (e.g. bumper crops)                                                                                               | (FAO, 2013)<br>(Göbel et al., 2012)<br>(Lipinski et al., 2017)<br>(Teuber and Jensen, 2016)<br>(Priefer et al., 2016)                                                   |
| 9  | x | x | x |   |   |   | Procurement                                    | Avoid price reductions by suppliers when buying large batches                                                                                                                                                                                                                | (Göbel et al., 2014)                                                                                                                                                    |
| 10 |   | x | x | x |   |   | Procurement – short chains                     | “localization” of supply chain to reduce the time food spends in transit                                                                                                                                                                                                     | (Hegnsholt et al., 2018)                                                                                                                                                |
| 11 | x | x | x |   |   | x | Infrastructure and transport                   | Improve infrastructure (storage, cooling, ...) and transportation                                                                                                                                                                                                            | (Gustavsson et al., 2011)<br>(Lipinski et al., 2017)                                                                                                                    |
| 12 |   | x |   |   |   |   | Processing – diversion into other food streams | Valorise by-products, side streams and non-used food; divert preparation losses as input into other food products (e.g. potato leftovers from French fries manufacturing to be used to make croquettes or mashed potatoes)                                                   | (HLPE, 2014)<br>(Göbel et al., 2012)                                                                                                                                    |
| 13 |   | x | x |   |   |   | Storage and distribution – cold chain          | Lower temperature in the cold chain; proper cold chain management; innovative approaches such as remote container management to continuously monitor container temperature and humidity and intervene where needed; early warning systems; comply with food safety standards | (Teuber and Jensen, 2016)<br>(ReFED, 2016a)<br>(Hegnsholt et al., 2018)<br>(Göbel et al., 2012)<br>(Gustavsson et al., 2011)<br>(HLPE, 2014)<br>(Eriksson et al., 2016) |
| 14 |   | x | x |   |   |   | Process optimisation                           | Manufacturing line optimization; increase supply chain efficiency                                                                                                                                                                                                            | (ReFED, 2016a)<br>(Hegnsholt et al., 2018)<br>(Göbel et al., 2012)                                                                                                      |
| 15 |   | x | x |   |   |   | Packaging – optimisation & portions            | Packaging adjustments; smaller packages; portion-sized; easy to empty; adapted to target group; offer wrapped biscuits (allowing leftovers to be reused) storage or freezing instructions (directed at consumers) on packaging;                                              | (HLPE, 2014)<br>(ReFED, 2016a, 2016b)<br>(WRAP, 2006)<br>(WRAP, 2007)<br>(WRAP, 2017a)<br>(Lipinski et al., 2017)<br>(Teuber and Jensen,                                |

|    | A | S | R | P | O | L | Focus                      | Measure                                                                                                                                                                                                                                                                                                    | Source                                                                                                                                                                                           |
|----|---|---|---|---|---|---|----------------------------|------------------------------------------------------------------------------------------------------------------------------------------------------------------------------------------------------------------------------------------------------------------------------------------------------------|--------------------------------------------------------------------------------------------------------------------------------------------------------------------------------------------------|
|    |   |   |   |   |   |   |                            |                                                                                                                                                                                                                                                                                                            | 2016)<br>(WRAP, 2015)<br>(Schanes et al., 2018)<br>(WRAP, 2010a, 2013a, 2013d)<br>(WRAP, 2014, 2017b)<br>(Aschemann-Witzel et al., 2015)                                                         |
| 16 |   | x | x |   |   |   | Packaging - technologies   | Minimise packaging in weight but optimise its functionality; smart packaging or spoilage prevention packaging (e.g. breathable polymer films, aseptic technology, modified atmosphere packaging, hermetic seals, re-sealable packaging); ethylene-absorbing strip to increase shelf life of fresh produce  | (FAO, 2013)<br>(Gunders, 2012)<br>(HLPE, 2014)<br>(ReFED, 2016a, 2016b)<br>(Stenmarck et al., 2011)<br>(WRAP, 2013c)<br>(WRAP, 2006)<br>(WRAP, 2007)<br>(Hegnsholt et al., 2018)<br>(WRAP, 2015) |
| 17 |   |   | x |   |   |   | Packaging – no packaging   | Sell items loose rather than in fixed portions, so customers only buy the quantity they need; sell fruits and vegetables per weight instead of per piece (create opportunity to sell fruits & vegetables of different size and shape); avoid products being thrown if 1 item within the package is spoiled | (FAO, 2013)<br>(Hafner et al., 2012)<br>(Teuber and Jensen, 2016)<br>(Göbel et al., 2012)                                                                                                        |
| 18 | x | x | x | x |   |   | Excess food                | Repurpose excess food through multi-stakeholder collaborations; day-before bakeries selling bakers' wares of the previous day; spontaneous selling actions                                                                                                                                                 | (ReFED, 2016a, 2016b)<br>(Hafner et al., 2012)<br>(Göbel et al., 2012)                                                                                                                           |
| 19 |   | x |   |   |   |   | Awareness, habits, culture | Promotion of a culture of waste reduction, driving all other activities such as training, performance measurement and incentives                                                                                                                                                                           | (Teuber and Jensen, 2016)                                                                                                                                                                        |
| 20 |   | x | x |   |   |   | Storage conditions         | Appropriate storage conditions; adapt temperature and humidity to product; doors on fridges in shops (additional benefit: shelves look more full)                                                                                                                                                          | (Göbel et al., 2012)<br>(HLPE, 2014)<br>(Stenmarck et al., 2011)                                                                                                                                 |
| 21 |   | x | x |   |   |   | Processing                 | Fruit and vegetable processing into dried/dehydrated products, juices, concentrates, jams and purees; develop appropriate technologies and infrastructure; investments in infrastructure and knowledge acquisition; find alternatives to disposal when food cannot be sold                                 | (HLPE, 2014)<br>(Aschemann-Witzel et al., 2015)                                                                                                                                                  |
| 22 |   | x |   |   |   |   | Processing - trimming      | Improving processing techniques; improved trimming; possibly centralized trimming rather than trimming by end-user (fewer waste + potential to use scrap by-products)                                                                                                                                      | (FAO, 2013)                                                                                                                                                                                      |
| 23 |   |   | x |   |   |   | Inventory management       | Daily control of fresh produce to avoid 1 spoiled item contaminating the entire batch                                                                                                                                                                                                                      | (Göbel et al., 2014)                                                                                                                                                                             |
| 24 |   |   | x |   |   |   | Inventory management       | Shorten the period of time between buying and selling; avoid stockpiling; improve inventory management; keep control of stock and sales statistics; store products based on “first in first out” principle                                                                                                 | (Göbel et al., 2012)<br>(Koester, 2014)<br>(ReFED, 2016a)<br>(Stenmarck et al., 2011)                                                                                                            |
| 25 | x | x | x |   |   |   | Improved forecasting       | Simplify and optimize product ordering system; avoid incorrect orders and excessive order volumes; develop more accurate supply & demand forecasting models e.g. take into account weather                                                                                                                 | (Hafner et al., 2012)<br>(Teuber and Jensen, 2016)<br>(Rutten et al., 2013)                                                                                                                      |

|    | A | S | R | P | O | L | Focus                           | Measure                                                                                                                                                                                                                                                                                          | Source                                                                                                                                                                                                                                                                  |
|----|---|---|---|---|---|---|---------------------------------|--------------------------------------------------------------------------------------------------------------------------------------------------------------------------------------------------------------------------------------------------------------------------------------------------|-------------------------------------------------------------------------------------------------------------------------------------------------------------------------------------------------------------------------------------------------------------------------|
|    |   |   |   |   |   |   |                                 | Remark: fine-tuning orders and more frequent deliveries to be balanced with the consequent labour costs and transport impacts                                                                                                                                                                    | (Hegnsholt et al., 2018)<br>(Göbel et al., 2012)<br>(Lipinski et al., 2017)                                                                                                                                                                                             |
| 26 |   |   | x |   |   |   | Date labelling                  | Sell items close to their use-by date rather than throwing them, e.g. at lower price; highlight bargains for products nearing best-before date; expose goods with the shortest shelf life left; donate food that is soon turning “un-saleable” or for which the best-before date has been passed | (FAO, 2013)<br>(Göbel et al., 2014)<br>(Hafner et al., 2012)<br>(Stenmarck et al., 2011)<br>(Göbel et al., 2012)<br>(Schanes et al., 2018)                                                                                                                              |
| 27 |   |   | x | x |   | x | Date labelling - interpretation | Standardize date labelling on ‘best-before’ and ‘use-by’ dates; inform consumers on meaning of labels                                                                                                                                                                                            | (FAO, 2013)<br>(Koester, 2014)<br>(ReFED, 2016a)<br>(Hegnsholt et al., 2018)<br>(Lipinski et al., 2017)<br>(Lipinski et al., 2013)<br>(WRAP, 2017a)<br>(Teuber and Jensen, 2016)<br>(Priefer et al., 2016)<br>(Schanes et al., 2018)<br>(Aschemann-Witzel et al., 2015) |
| 28 |   |   | x |   |   |   | Product line                    | Good knowledge of the customers; adapt product line/range to customers                                                                                                                                                                                                                           | (Stenmarck et al., 2011)                                                                                                                                                                                                                                                |
| 29 |   |   | x |   |   |   | Product line - abundance        | Less opulence in retail (quantities and range of products); do not continually replenish supplies; bring down stock at end of the day                                                                                                                                                            | (FAO, 2013)<br>(Gustavsson et al., 2011)<br>(Göbel et al., 2012)                                                                                                                                                                                                        |
| 30 |   |   | x |   |   |   | Staff training                  | Personnel education on impact (environmental and economic) associated with food waste                                                                                                                                                                                                            | (Stenmarck et al., 2011)                                                                                                                                                                                                                                                |
| 31 |   | x | x |   |   |   | Staff training                  | Personnel education on how and when to place orders, and on how to handle and store food; knowledge of the best practice and the routines for treatment of food waste; training on how to process food and minimize cleaning losses                                                              | (Stenmarck et al., 2011)<br>(Teuber and Jensen, 2016)<br>(Hegnsholt et al., 2018)<br>(Göbel et al., 2012)                                                                                                                                                               |
| 32 | x | x | x |   | x |   | Education and staff training    | Integrate the issue of food waste in education programmes related to the food sector; capacity development along the food chain                                                                                                                                                                  | (Hafner et al., 2012)<br>(HLPE, 2014)                                                                                                                                                                                                                                   |
| 33 |   |   | x |   |   |   | Date labelling                  | Research into dynamic best-before dates based on compliance with the cold chain and quality of foods                                                                                                                                                                                             | (Hafner et al., 2012)                                                                                                                                                                                                                                                   |
| 34 | x |   | x | x | x | x | Awareness and information       | Provide information and raise awareness; encourage consumers to shift away from products that contribute to waste; educate consumers that not everything needs to be available at all times; increase acceptability of “ugly food” or food nearing expiration date                               | (Hafner et al., 2012)<br>(FAO, 2013)<br>(Hegnsholt et al., 2018)<br>(Göbel et al., 2012)<br>(Schanes et al., 2018)<br>(Wunder et al., 2019)<br>(Aschemann-Witzel et al., 2015)                                                                                          |
| 35 |   |   | x | x |   | x | Awareness raising - attitudes,  | Campaigns to raise awareness and educate consumers; change culture of food waste; change consumption habits;                                                                                                                                                                                     | (Hafner et al., 2012)<br>(EPA, 2016)<br>(Kranert et al., 2012b)                                                                                                                                                                                                         |

|    | A | S | R | P | O | L | Focus                                             | Measure                                                                                                                                                                                                                                                                                               | Source                                                                                                                                                                                                     |
|----|---|---|---|---|---|---|---------------------------------------------------|-------------------------------------------------------------------------------------------------------------------------------------------------------------------------------------------------------------------------------------------------------------------------------------------------------|------------------------------------------------------------------------------------------------------------------------------------------------------------------------------------------------------------|
|    |   |   |   |   |   |   | habits and behaviour                              |                                                                                                                                                                                                                                                                                                       | (FAO, 2013)<br>(Gustavsson et al., 2011)<br>(ReFED, 2016a)<br>(WRAP, 2015; Hanson and Mitchell, 2017)                                                                                                      |
| 36 |   |   |   | x |   |   | Awareness raising – Self-reflection, social norms | Campaigns to influence social norms; trigger peer influences; bin-cam capturing and sharing images of waste on an online social platform; motivate competition to do better                                                                                                                           | (Wunder et al., 2019)<br>(Aschemann-Witzel et al., 2015)<br>(Thieme et al., 2012; Comber and Thieme, 2013),                                                                                                |
| 37 |   |   |   | x |   | x | Advice to enable behavioural changes              | Advice on how to avoid waste, how to shop, prepare and store food; internet-based platforms; improve food skills and handling                                                                                                                                                                         | (Hafner et al., 2012)<br>(EPA, 2016)<br>(Kranert et al., 2012b)<br>(Aschemann-Witzel et al., 2015)                                                                                                         |
| 38 |   |   |   | x |   |   | Food purchase                                     | Better planning of purchases; use shopping list; avoid impulsive or advance purchasing of food that is not required immediately; buy appropriate portions; no empty stomach shopping                                                                                                                  | (HLPE, 2014)<br>(Langen et al., 2015)<br>(BMEL, 2014)<br>(Hebrok and Boks, 2017)<br>(Schanes et al., 2018)                                                                                                 |
| 39 |   |   |   | x |   |   | Food purchase                                     | More frequent shopping (to be balanced with impacts from time spent and transportation); shop smaller quantities                                                                                                                                                                                      | (Britz et al., 2014)<br>(Langen et al., 2015)<br>(Koester, 2014)                                                                                                                                           |
| 40 |   |   |   | x |   |   | Storage – at home                                 | Appropriate storage and cooling practices at home; lowering refrigerator temperatures; better stock management, use appropriate food containers; intelligent fridges and inventory apps; storage instructions on packaging (provided by retail/packaging industry); freeze food for later consumption | (HLPE, 2014)<br>(BMEL, 2014)<br>(Hebrok and Boks, 2017)<br>(Schanes et al., 2018)<br>(WRAP, 2013b, 2015)<br>(WRAP, 2010a, 2013a, 2013d)<br>(WRAP, 2010b)<br>(Brown et al., 2014b)<br>(Brown et al., 2014a) |
| 41 |   |   |   | x |   |   | Food preparation –at home                         | Appropriate portion sizes to prepare; better food preparation techniques (incl. trimming); make full use of fruits and vegetables to extract all the nutritional benefits; use leftovers on other recipes                                                                                             | (Britz et al., 2014)<br>(HLPE, 2014)<br>(BMEL, 2014)<br>(ReFED, 2018)<br>(Lipinski et al., 2017)<br>(Schanes et al., 2018)                                                                                 |
| 42 | x | x | x |   |   |   | Monitoring and tracking                           | Constant collection of data on food waste and losses                                                                                                                                                                                                                                                  | (Kranert et al., 2012b)<br>(Hafner et al., 2012)                                                                                                                                                           |
| 43 |   |   |   |   |   | x | Staff - awareness and sensibilisation             | Create awareness and show food waste avoidance potential (e.g. through FW tracking devices); show economic value of food gone wasted; staff training; set FW reduction goals                                                                                                                          | (Kranert et al., 2012b)<br>(Waskow et al., 2016)<br>(Göbel et al., 2014)<br>(iSuN, 2014)<br>(Leanpath, 2016)<br>(SRA, 2017)<br>(WRAP, 2014, 2017b)<br>(Leanpath, 2019)<br>(Futouris, 2019)                 |

|    | A | S | R | P | O | L | Focus                                      | Measure                                                                                                                                                                                                                                                                                                       | Source                                                                                                                                                                                                                                           |
|----|---|---|---|---|---|---|--------------------------------------------|---------------------------------------------------------------------------------------------------------------------------------------------------------------------------------------------------------------------------------------------------------------------------------------------------------------|--------------------------------------------------------------------------------------------------------------------------------------------------------------------------------------------------------------------------------------------------|
| 44 |   |   |   |   | x |   | Staff - engagement                         | Staff training; create incentives (e.g. “FW champion”); ensure staff is familiar with the menu                                                                                                                                                                                                                | (Göbel et al., 2014)<br>(WRAP, 2013g)<br>(WRAP, 2018)<br>(Leanpath, 2016)<br>(Clowes et al., 2018a)<br>(Clowes et al., 2018b)<br>(Clowes et al., 2019)<br>(Leanpath, 2019)                                                                       |
| 45 |   |   |   |   | x |   | Staff - training                           | Training on promotion of use of doggy bags/boxes, awareness of surplus food redistribution and correct portioning                                                                                                                                                                                             | (WRAP, 2013c)<br>(Göbel et al., 2014)                                                                                                                                                                                                            |
| 46 |   |   |   |   | x |   | Staff – training food orders & preparation | Train staff for ordering the appropriate amounts of food, preparing the right amounts of food and serving the right portion sizes; train on reducing preparation and trimming losses; train staff on how to best store products                                                                               | (Göbel et al., 2014)<br>(Betz et al., 2015)<br>(WRAP, 2018)<br>(SRA, 2017)<br>(Winnow, 2019)<br>(Schanes et al., 2018)                                                                                                                           |
| 47 |   |   |   |   | x |   | Inventory - stock management               | Careful management of stock; “first in first out” principle; review stock rotation and ordering procedures; label all products, incl. expiry date                                                                                                                                                             | (WRAP, 2013c)<br>(WRAP, 2013g)<br>(Hrad et al., 2015)<br>(Betz et al., 2015)<br>(WRAP, 2018)<br>(Baldwin et al., 2011)<br>(ReFED, 2018)<br>(Pirani and Arafat, 2014)<br>(Fink et al., 2016)<br>(SRA, 2017)<br>(Hotrec, 2017)<br>(Futouris, 2019) |
| 48 |   |   |   |   | x |   | Inventory - storage                        | Proper storage (eg air circulation for fresh produce); keeping fridges and refrigerators clean; check quality of purchased products before storing them; ensure cold chain is not broken (e.g. during transport for outside catering); prevent spoilage; extend shelf life through for example vacuum packing | (Pirani and Arafat, 2014)<br>(Fink et al., 2016)<br>(Winnow, 2019)<br>(Hotrec, 2017)<br>(Futouris, 2019)                                                                                                                                         |
| 49 | o | o | o |   | x |   | Ordering process - procurement             | Review ordering procedures; negotiate deals with suppliers on smaller packs tailored to restaurant needs; ensure that the quality/characteristics of the product fit with your needs; base purchasing needs on standardised recipes and on current stock                                                      | (ReFED, 2018)<br>(WRAP, 2018)<br>(Fink et al., 2016)<br>(SRA, 2017)<br>(Hotrec, 2017)                                                                                                                                                            |
| 50 |   |   |   |   | x |   | Forecasting – guest/patient numbers        | Monitor consumer numbers and waste; compare estimated number of guests/patients with actual measured number to improve planning parameters; improve information flow on any changes related to expected number of guests or patients; guest RSVP                                                              | (WRAP, 2013c)<br>(WRAP, 2013g)<br>(Göbel et al., 2014)<br>(WRAP, 2018)<br>(ReFED, 2018)<br>(WWF, 2017)<br>(Dias-Ferreira et al., 2015)<br>(Futouris, 2019)                                                                                       |
| 51 |   |   |   |   | x |   | Menu planning – guest preferences          | Ask consumers to pre-select meals; take into account seasonal variations and preferences (e.g. salad in summer) or variations related to holidays/weekends vs weekdays; know your clientele (eg dishes targeted at children in schools);                                                                      | (WRAP, 2013c)<br>(Göbel et al., 2014)<br>(Silvennoinen et al., 2015)<br>(Schmidt et al., 2018)                                                                                                                                                   |

|    | A | S | R | P | O | L | Focus                                    | Measure                                                                                                                                                                                                                                                                                                                   | Source                                                                                                                                                                                                                 |
|----|---|---|---|---|---|---|------------------------------------------|---------------------------------------------------------------------------------------------------------------------------------------------------------------------------------------------------------------------------------------------------------------------------------------------------------------------------|------------------------------------------------------------------------------------------------------------------------------------------------------------------------------------------------------------------------|
|    |   |   |   |   |   |   |                                          | take into account guest preferences, age, religious and cultural habits, and occasion (eg wedding vs business meeting)                                                                                                                                                                                                    | (ReFED, 2018)<br>(Pirani and Arafat, 2014)<br>(WWF, 2017)<br>(Fink et al., 2016)<br>(Hotrec, 2017)<br>(BMEL, 2015)<br>(Futouris, 2019)                                                                                 |
| 52 |   |   | o |   | x |   | Menu planning – flexibility              | Flexibility in menu or “Dish of the day” to use leftover ingredients, items bought spontaneously (as supplier wanted to get rid of products in critical state) or items close to expiry date; be creative with leftovers (soups, sauces...); use kitchen left-overs for a following day’s service (e.g. through freezing) | (Göbel et al., 2014)<br>(WRAP, 2013g)<br>(WRAP, 2013c)<br>(Hrad et al., 2015)<br>(Betz et al., 2015)<br>(ReFED, 2018)<br>(Clowes et al., 2018b)<br>(SRA, 2017)<br>(Winnow, 2019)<br>(Hotrec, 2017)<br>(Futouris, 2019) |
| 53 |   |   |   |   | x |   | Menu planning – maximise ingredient use  | Maximise use of any one food item on the menu (waste of one ingredient as input to another meal); use smaller amounts of ingredients that can be used for wide range of dishes; reduce number of menu choices                                                                                                             | (WRAP, 2013g)<br>(Göbel et al., 2014)<br>(Hrad et al., 2015)<br>(ReFED, 2018)<br>(Leanpath, 2016)<br>(WWF, 2017)<br>(Winnow, 2019)<br>(Hotrec, 2017)<br>(WRAP, 2014, 2017b)<br>(Futouris, 2019)                        |
| 54 |   |   |   |   | x |   | Menu planning - menu engineering and ABC | Menu engineering on profitability and popularity of menu items; assign all purchasing and overhead costs to menu items to obtain appropriate price for each dish (activity-based costing, ABC)                                                                                                                            | (Pirani and Arafat, 2014)                                                                                                                                                                                              |
| 55 |   |   |   |   | x |   | Food preparation - planning              | Optimize production planning using sophisticated software solutions; use a computer-based programme for recipe-management; optimize production volume (and portion per guest); reduce buffer for overproduction; plan smaller portions                                                                                    | (Göbel et al., 2014)<br>(Schmidt et al., 2018)<br>(Fink et al., 2016)<br>(Winnow, 2019)<br>(WRAP, 2014, 2017b)<br>(Futouris, 2019)                                                                                     |
| 56 |   | o | x |   | x |   | Food preparation - convenience grade     | Procure part of menu in pre-prepared format to reduce preparation waste and allow for greater responsiveness and flexibility in case of changes in number of guests; use of pre-trimmed produce, meats and fish; purchase of dough pieces to be baked on the spot                                                         | (WRAP, 2013c)<br>(ReFED, 2018)<br>(Göbel et al., 2012)                                                                                                                                                                 |
| 57 |   |   |   |   | x |   | Food preparation – recipes and serving   | Use weight-based and standardized recipes so the right quantity of food is prepared for the number of servings required; use standardised serving spoons or plates; ensure a good mise en place                                                                                                                           | (WRAP, 2013c)<br>(Göbel et al., 2014)<br>(Hrad et al., 2015)<br>(Fink et al., 2016)<br>(Hotrec, 2017)<br>(Futouris, 2019)                                                                                              |
| 58 |   |   |   |   | x |   | Food preparation – preparation losses    | Reduce preparation losses; reduce trim waste (apply yield testing); choose ingredients based on how much is considered edible (cfr WWF Produce Yield Ranking Tool which rates ingredients based on how much is typically considered edible)                                                                               | (Baldwin et al., 2011)<br>(Betz et al., 2015)<br>(WWF, 2017)<br>(Winnow, 2019)<br>(Hotrec, 2017)                                                                                                                       |



|    | A | S | R | P | O | L | Focus                                         | Measure                                                                                                                                                                                                                                                                                                                                                                                                                                                                                                                               | Source                                                                                                                                                                                                                                                                                                                                                                                                                                                                                                                               |
|----|---|---|---|---|---|---|-----------------------------------------------|---------------------------------------------------------------------------------------------------------------------------------------------------------------------------------------------------------------------------------------------------------------------------------------------------------------------------------------------------------------------------------------------------------------------------------------------------------------------------------------------------------------------------------------|--------------------------------------------------------------------------------------------------------------------------------------------------------------------------------------------------------------------------------------------------------------------------------------------------------------------------------------------------------------------------------------------------------------------------------------------------------------------------------------------------------------------------------------|
| 59 | o | o | o |   | x |   | Food preparation – imperfect produce          | Use imperfect produce (second grade vegetables) - take into account additional working time spent                                                                                                                                                                                                                                                                                                                                                                                                                                     | (Teuber and Jensen, 2016)<br>(Lynnerup, 2016)<br>(ReFED, 2018)                                                                                                                                                                                                                                                                                                                                                                                                                                                                       |
| 60 |   |   |   |   | x |   | Food service - buffet                         | Change practices and quantities served towards end of service (smaller food containers; reduce buffet lines from 2 to 1); cook on demand; enable requirements-oriented refilling of food containers (smaller or separable units); use chafers with adjustable tray heights; no overstocking; individual servings rather than food pans; pre-portion items individually at the buffet; change display of food (eg pastries nicely displayed on a tray rather than piled baskets); reduce continuous availability of food on the buffet | (FAO, 2013)<br>(Göbel et al., 2014)<br>(Hrad et al., 2015)<br>(Betz et al., 2015)<br>(Schmidt et al., 2018)<br>(ReFED, 2018)<br>(Clowes et al., 2018b)<br>(WWF, 2017)<br>(Fink et al., 2016)<br>(Leverenz et al., 2016)<br>(WRAP, 2014, 2017b)<br>(Leanpath, 2019)<br>(Futouris, 2019)                                                                                                                                                                                                                                               |
| 61 |   |   |   |   | x |   | Food service - Portion sizes and side dishes  | Offer refills; smaller portion sizes (at lower prices); offer customers to choose their side dishes; bread, butter or side dishes on demand; use a pictorial representation of a portion as a basis for serving (within sight of where meals are served); adapt portion sizes to target groups (eg small children vs adults); meet consumer expectations; “mobile catering” in hospitals plating food at the room (instead of in the kitchen), allowing clients to choose what and how much to eat                                    | (WRAP, 2013c)<br>(WRAP, 2013g)<br>(Lipinski et al., 2013)<br>(WRAP, 2013f)<br>(WRAP, 2014, 2017b)<br>(Göbel et al., 2014)<br>(Hrad et al., 2015)<br>(Snels and Wassenaar, 2011; Kranert et al., 2012a)<br>(Schmidt et al., 2018)<br>(WRAP, 2018)<br>(Baldwin et al., 2011)<br>(ReFED, 2018)<br>(Leanpath, 2016)<br>(Fink et al., 2016)<br>(Priefer et al., 2016)<br>(SRA, 2017)<br>(Lipinski et al., 2017)<br>(Dias-Ferreira et al., 2015)<br>(Hotrec, 2017)<br>(Dias-Ferreira et al., 2015)<br>(Leanpath, 2019)<br>(Futouris, 2019) |
| 62 |   |   |   |   | x |   | Food service – presentation                   | Improved and more attractive meal presentation; make clear which dishes contain meat/fish/... or which ones are vegetarian; label ingredients                                                                                                                                                                                                                                                                                                                                                                                         | (Navarro et al., 2016)<br>(BMEL, 2015)<br>(Leanpath, 2019)<br>(Futouris, 2019)                                                                                                                                                                                                                                                                                                                                                                                                                                                       |
| 63 |   |   |   |   | x |   | Nudges to guests – plates and trays at buffet | Smaller plates; smaller serving utensils at the buffet; tray-less dining; “pay-by-weight” rather than “all-you-can-eat”; use of permanent plates instead of disposable ones                                                                                                                                                                                                                                                                                                                                                           | (ReFED, 2016a, 2016b)<br>(Göbel et al., 2014)<br>(Betz et al., 2015)<br>(Lipinski et al., 2013)<br>(ReFED, 2018)<br>(Kallbekken and Sælen, 2013)                                                                                                                                                                                                                                                                                                                                                                                     |



|    | A | S | R | P | O | L | Focus                                         | Measure                                                                                                                                                                                                                                                                    | Source                                                                                                                                                                                                                                                                                                                                                                              |
|----|---|---|---|---|---|---|-----------------------------------------------|----------------------------------------------------------------------------------------------------------------------------------------------------------------------------------------------------------------------------------------------------------------------------|-------------------------------------------------------------------------------------------------------------------------------------------------------------------------------------------------------------------------------------------------------------------------------------------------------------------------------------------------------------------------------------|
|    |   |   |   |   |   |   |                                               |                                                                                                                                                                                                                                                                            | (Pirani and Arafat, 2014)<br>(Fink et al., 2016)<br>(Priefer et al., 2016)<br>(Schanes et al., 2018)<br>(Thiagarajah and Getty, 2013)<br>(Williamson et al., 2016)<br>(Leanpath, 2019)<br>(Wansink and van Ittersum, 2013)                                                                                                                                                          |
| 64 |   |   |   |   | x |   | Monitoring and tracking                       | Measure amounts of food waste, types of products gone wasted and reasons why; make use of tracking sheets and/or digital tools such as smart scales<br>Focus on both kitchen as well as plate waste                                                                        | (ReFED, 2016a, 2016b)<br>(WRAP, 2013c)<br>(WRAP, 2014, 2017b)<br>(Silvennoinen et al., 2015)<br>(WRAP, 2018)<br>(Sakaguchi et al., 2018)<br>(ReFED, 2018)<br>(Leanpath, 2016)<br>(Leverenz et al., 2016)<br>(Clowes et al., 2018a)<br>(Clowes et al., 2018b)<br>(Clowes et al., 2019)<br>(Winnow, 2019),<br>(Winnow, 2018a, 2018b)<br>(City of Hillsboro, 2010)<br>(Leanpath, 2019) |
| 65 |   |   |   |   | x |   | Menu planning - waste monitoring and feedback | Carefully monitor uptake of different menu types and cycles, and link this with waste monitoring data; identify consistently returned food items and seek for feedback on why this was the case; avoid overproduction of less popular dishes; identify most popular dishes | (WRAP, 2013c)<br>(Göbel et al., 2014)<br>(WRAP, 2013g)<br>(Betz et al., 2015)<br>(Leanpath, 2016)<br>(Fink et al., 2016)<br>(Winnow, 2019)                                                                                                                                                                                                                                          |
| 66 |   |   |   |   | x |   | Internal communication                        | Communicate with kitchen staff on buffet and plate leftovers, and on feedback from customers on portion sizes, expectations and reasons why food was left behind                                                                                                           | (Schmidt et al., 2018)<br>(Göbel et al., 2014)<br>(Hotrec, 2017)                                                                                                                                                                                                                                                                                                                    |
| 67 |   |   |   |   | x |   | Food service - leftover take away             | Offer take away boxes for leftovers; encourage consumers to take their leftovers with them and consume them at home<br>REMARK: do not encourage customers to request larger portions so they can take it home                                                              | (FAO, 2013)<br>(WRAP, 2013c)<br>(Hrad et al., 2015)<br>(WRAP, 2018)<br>(Sakaguchi et al., 2018)<br>(SRA, 2017)<br>(Stöckli et al., 2018)<br>(Hotrec, 2017)<br>(WRAP, 2014, 2017b)                                                                                                                                                                                                   |
| 68 |   |   |   |   | x |   | Food service – catering & take away           | At the end of service (or during the last break of a conference), provide for food that can be taken home by participants (fruit, sandwiches,...); inform participants of this possibility and provide for appropriate packaging                                           | (BMEL, 2015)                                                                                                                                                                                                                                                                                                                                                                        |

|    | A | S | R | P | O | L | Focus                                               | Measure                                                                                                                                                                                                                                                                                                                                                                                                                           | Source                                                                                                                                                                                                                                                                                                                                                                                                                                                                                                                       |
|----|---|---|---|---|---|---|-----------------------------------------------------|-----------------------------------------------------------------------------------------------------------------------------------------------------------------------------------------------------------------------------------------------------------------------------------------------------------------------------------------------------------------------------------------------------------------------------------|------------------------------------------------------------------------------------------------------------------------------------------------------------------------------------------------------------------------------------------------------------------------------------------------------------------------------------------------------------------------------------------------------------------------------------------------------------------------------------------------------------------------------|
| 69 |   |   |   |   | x |   | Food surplus – staff meals                          | Use food surplus to prepare staff meals; use food close to expiry date                                                                                                                                                                                                                                                                                                                                                            | (SRA, 2017)<br>(Hotrec, 2017)                                                                                                                                                                                                                                                                                                                                                                                                                                                                                                |
| 70 |   |   |   |   | x |   | Nudges and prompts – signs at buffet                | Informational signs “only take what you will eat” or “eat what you take”; “visit our buffet multiple times”; fine customers for leftover plate waste                                                                                                                                                                                                                                                                              | (Lipinski et al., 2013)<br>(Göbel et al., 2014)<br>(Kallbekken and Sælen, 2013)<br>(Pirani and Arafat, 2014)<br>(Priefer et al., 2016)<br>(Whitehair et al., 2013)                                                                                                                                                                                                                                                                                                                                                           |
| 71 |   |   |   |   | x |   | Customer – sensibilisation                          | Increase tolerance of customers towards sustainability measures; provide sign “we are fighting food waste - not everything may be available at all times”                                                                                                                                                                                                                                                                         | (Betz et al., 2015)<br>(Göbel et al., 2014)<br>(Waskow et al., 2016)<br>(WWF, 2017)<br>(Hotrec, 2017)                                                                                                                                                                                                                                                                                                                                                                                                                        |
| 72 |   |   |   |   | x |   | Clients – awareness, engagement and sensibilisation | Encourage customers to act more sustainably; in case of school catering: ask teachers, students, ... to become “FW champions” or “food savers” and keep an eye on how much food is served and eaten; provide incentives; inform clients on how much food was wasted (eg FW barometer) and what they can do to avoid; communication with clients; inform customers what the restaurant/food service is doing                       | (Göbel et al., 2014)<br>(Schmidt et al., 2018)<br>(Hotrec, 2017)<br>(Ellison et al., 2017)<br>(Leanpath, 2019)<br>(Futouris, 2019)                                                                                                                                                                                                                                                                                                                                                                                           |
| 73 |   |   |   |   | x |   | Marketing                                           | Award certificates; initiate a hotel and restaurant industry federation; green tourism map                                                                                                                                                                                                                                                                                                                                        | (Hafner et al., 2012)                                                                                                                                                                                                                                                                                                                                                                                                                                                                                                        |
| 74 | x | x | x |   | x | x | Food redistribution and donation                    | Make partnerships for food donation; facilitate redistribution of overproduced food to charities or to staff; improve food banks’ infrastructure to allow for more frequent food collection and sufficient storage facilities; improve on-site storage and refrigeration possibilities for prepared food in restaurants; encourage food donation e.g. through donation tax incentives; educate potential donors on liability laws | (Betz et al., 2015)<br>(Cicatiello et al., 2016)<br>(FAO, 2013)<br>(Göbel et al., 2014)<br>(Hermsdorf et al., 2017)<br>(HLPE, 2014)<br>(Hrad et al., 2015)<br>(Lipinski et al., 2013)<br>(Pirani and Arafat, 2014)<br>(ReFED, 2016a, 2016b)<br>(ReFED, 2018)<br>(Sakaguchi et al., 2018)<br>(Silvennoinen et al., 2015)<br>(SRA, 2017)<br>(Teuber and Jensen, 2016)<br>(WRAP, 2018)<br>(WWF, 2017)<br>(Hegnsholt et al., 2018)<br>(Lipinski et al., 2017)<br>(Hotrec, 2017)<br>(Schanes et al., 2018)<br>(WRAP, 2014, 2017b) |
| 75 | x | x |   |   |   |   | Food donation – process excess food                 | Extend usable life of donated foods (imperfect produce, unharvested food, overproduction at processing stage...) through processing, e.g. make soups, sauces or other value-added products                                                                                                                                                                                                                                        | (ReFED, 2016a, 2016b)                                                                                                                                                                                                                                                                                                                                                                                                                                                                                                        |

| Measure                                                                                                                                                                  | Source                 | LC stage or sector in focus | Location & Scale | Effectiveness                                                                                       | Environmental impacts or savings                                                                                                                                                                                                                                                                                                                                                                                                  | Economic costs and benefits<br>Social impacts                                                                                                                                                                                                                                                                                                                                                                                                                                                                                                                                                                                                                                                                                                                                                                                                                                                                                                                                                                                                                                                                                                                                                                                                                                                                                                                                                                                                                                                                                                                                                |
|--------------------------------------------------------------------------------------------------------------------------------------------------------------------------|------------------------|-----------------------------|------------------|-----------------------------------------------------------------------------------------------------|-----------------------------------------------------------------------------------------------------------------------------------------------------------------------------------------------------------------------------------------------------------------------------------------------------------------------------------------------------------------------------------------------------------------------------------|----------------------------------------------------------------------------------------------------------------------------------------------------------------------------------------------------------------------------------------------------------------------------------------------------------------------------------------------------------------------------------------------------------------------------------------------------------------------------------------------------------------------------------------------------------------------------------------------------------------------------------------------------------------------------------------------------------------------------------------------------------------------------------------------------------------------------------------------------------------------------------------------------------------------------------------------------------------------------------------------------------------------------------------------------------------------------------------------------------------------------------------------------------------------------------------------------------------------------------------------------------------------------------------------------------------------------------------------------------------------------------------------------------------------------------------------------------------------------------------------------------------------------------------------------------------------------------------------|
| <ul style="list-style-type: none"> <li>Imperfect produce: co-op “Fruta Feia” buys ugly produce from farmers and sells it to consumers through delivery points</li> </ul> | (Ribeiro et al., 2018) | Agric.                      | PT, 1 co-op      | <p>Based on tons of ugly produce sold and thus diverted from landfill</p> <p>171 tonnes in 2015</p> | <p>LCA (ReCiPe Midpoint method). Incl: full life cycle impacts of produce; avoided landfilling; transport from farm to delivery point; production of reusable fabric bags and wooden boxes (consumer baskets). Excl: consumer transport; logistics of delivery point (manual work)</p> <p>Each kg fruit/vegetable sold avoids 0.14 kgCo<sub>2</sub>eq emissions. Over 5 yrs: 108 tonnes of Co<sub>2</sub>eq emissions avoided</p> | <p>ECON: incl. variable costs such as purchase of produce from farmers and transport to the delivery points; fixed costs such as personnel costs, webpage, services and investments in logistics and computer hardware; revenues from selling produce to consumers. Thus based on value of food no longer wasted + implementation costs; excl. are the avoided disposal/landfilling costs.<br/>SOC: Social-Life Cycle Assessment (S-LCA)<br/>ECON: Net present value (after 5 years) is positive; increases with number of delivery points<br/>SOC: fair salaries but often variable working hours for those involved in the delivery process; community engagement; creates food waste awareness at consumers; consumers buy produce at low prices, below market price; contribution to local employment and greater awareness as project is being replicated in other regions; increases revenue for local farmers + immediate payment; transparent system</p> <hr/> <p><b>EFFICIENCY:</b> Investment pay-back period (5 yr time frame; 3,5% discount rate); <b>Social Return on Investment (SROI)</b> method, monetizing the economic, environmental and social value created in order to assess the project’s contribution to society. Value of 1t CO<sub>2</sub> = € 52.7 (based on literature).</p> <p>Payback period: 4 yrs if only 1 delivery point; 2 yrs if 3 delivery points.<br/>SROI always &gt; 1 (for every €1 invested, the social value generation is higher than €1); SROI ranges from 1,11 for 1 delivery point after 1 yr to 1,69 for 3 delivery points after 5 yrs.</p> |

| Measure                                                                                                                                                                                                                                        | Source                                      | LC stage or sector in focus | Location & Scale                      | Effectiveness                                                                                                                                                                                                                              | Environmental impacts or savings                                                                                                                                                                                                                                                                                                                            | Economic costs and benefits<br>Social impacts                                                                                                                                                                                                                                                                       |
|------------------------------------------------------------------------------------------------------------------------------------------------------------------------------------------------------------------------------------------------|---------------------------------------------|-----------------------------|---------------------------------------|--------------------------------------------------------------------------------------------------------------------------------------------------------------------------------------------------------------------------------------------|-------------------------------------------------------------------------------------------------------------------------------------------------------------------------------------------------------------------------------------------------------------------------------------------------------------------------------------------------------------|---------------------------------------------------------------------------------------------------------------------------------------------------------------------------------------------------------------------------------------------------------------------------------------------------------------------|
| <ul style="list-style-type: none"> <li>Reduced storage temperature in cheese, dairy, deli and meat department of supermarket</li> </ul> <p>Meat: from 4 °C to 2 °C<br/>Deli: from 8 °C to 5–2 °C<br/>Cheese &amp; dairy: from 8 °C to 5 °C</p> | (Eriksson et al., 2016)                     | Retail                      | SWE, 6 supermarkets                   | For all products: lower t° lead to less FW with max. FW reduction of 16–30% at lowest storage t° of 2°C                                                                                                                                    | <p>Net effect = embodied GHGs of foods that are no longer wasted - GHG emissions associated with addit. electr. use for lower storage t°</p> <p>Net savings per store per year:<br/>Meat: 12 Mg CO<sub>2</sub>e.<br/>Deli: 0.4–0.8 Mg CO<sub>2</sub>e.<br/>Cheese &amp; dairy: net losses. For dairy: net savings possible when using green electr. mix</p> | <p>Net effect = value of foods that are no longer wasted - costs associated with addit. electr. use for lower storage t°</p> <p>Net savings per store per year:<br/>Meat: 56 kSEK<br/>Deli: 5–7 kSEK<br/>Cheese &amp; dairy: net losses</p>                                                                         |
| <b>EFFICIENCY:</b> net benefits calculated as benefits minus costs – see “Econ. Costs and benefits” section                                                                                                                                    |                                             |                             |                                       |                                                                                                                                                                                                                                            |                                                                                                                                                                                                                                                                                                                                                             |                                                                                                                                                                                                                                                                                                                     |
| <ul style="list-style-type: none"> <li>Better use of fridges: lowering fridge temperature and refrigerating foods which are not always stored in the fridge</li> </ul>                                                                         | (Brown et al., 2014b) + (WRAP, 2013b, 2015) | Households                  | UK, society                           | Results: +/- 71000 t FW avoided by lowering t°; +/- 81000 t for storing additional foods in the fridge                                                                                                                                     | <p>Net benefits = Embodied emissions of foods no longer wasted – emissions from additional electricity use</p> <p>Embodied emissions: 578383 t CO<sub>2</sub>; Electr. use: 367411 t CO<sub>2</sub><br/>Net reduction: +/- 210,000 tonnes CO<sub>2</sub></p>                                                                                                | <p>Net benefits = Value of foods that are no longer being wasted – costs associated with additional electricity use (Based on 2011 prices)</p> <p>Embodied value: £283,8m; Electr. costs: £80,9m<br/>Net Savings: £200 million (US\$320 million)</p>                                                                |
| <b>EFFICIENCY:</b> net benefits calculated as benefits minus costs – see “Econ. Costs and benefits” section                                                                                                                                    |                                             |                             |                                       |                                                                                                                                                                                                                                            |                                                                                                                                                                                                                                                                                                                                                             |                                                                                                                                                                                                                                                                                                                     |
| <ul style="list-style-type: none"> <li>Freezing at home</li> </ul>                                                                                                                                                                             | (Brown et al., 2014a)                       | Households                  | UK, 1 freezer in experimental setting | <p>1 freezer in experimental setting: Avoidance of 2,3 kg food going to waste (consisting of bread and leftovers prior/ after cooking)</p> <p>At society level: 630000 tonnes of “freezable” food frozen and eaten (instead of thrown)</p> | <p>Net benefits = Embodied emissions of foods no longer wasted – emissions from additional electricity use</p> <p>Experimental setting:<br/>Embodied emissions: 8,75 kg CO<sub>2</sub>; Electr. use: 0,068 kg CO<sub>2</sub><br/>Benefit ratio of 1/100</p> <p>Savings at society level: over 2.4 million tonnes CO<sub>2</sub></p>                         | <p>Net benefits = Value of foods that are no longer being wasted – costs associated with additional electricity use (from opening freezer and adding food)</p> <p>Experimental setting: Embodied value: £5,36;<br/>Electr. use: £0,018<br/>Benefit ratio of 1/300</p> <p>Savings at society level: £2.3 billion</p> |
| <b>EFFICIENCY:</b> net benefits calculated as benefits ratio – see “Econ. Costs and benefits” section                                                                                                                                          |                                             |                             |                                       |                                                                                                                                                                                                                                            |                                                                                                                                                                                                                                                                                                                                                             |                                                                                                                                                                                                                                                                                                                     |

| Measure                                                                                                                                                                                                                                                                                     | Source                                  | LC stage or sector in focus         | Location & Scale                      | Effectiveness                                                                                                                                                                              | Environmental impacts or savings                                                                                                                                                                                                                                                                                                                                                                                | Economic costs and benefits<br>Social impacts                                                                                                                                                                                                                                                                                                                                                                                                                              |
|---------------------------------------------------------------------------------------------------------------------------------------------------------------------------------------------------------------------------------------------------------------------------------------------|-----------------------------------------|-------------------------------------|---------------------------------------|--------------------------------------------------------------------------------------------------------------------------------------------------------------------------------------------|-----------------------------------------------------------------------------------------------------------------------------------------------------------------------------------------------------------------------------------------------------------------------------------------------------------------------------------------------------------------------------------------------------------------|----------------------------------------------------------------------------------------------------------------------------------------------------------------------------------------------------------------------------------------------------------------------------------------------------------------------------------------------------------------------------------------------------------------------------------------------------------------------------|
| <ul style="list-style-type: none"> <li>Love Food Hate Waste (LFHW) campaign</li> </ul>                                                                                                                                                                                                      | (WRAP, 2015; Hanson and Mitchell, 2017) | Households, authorities, businesses | UK, society                           | <p>15% reduction, or a reduction of 1.3 million tonnes household FW in 2012 compared to 2007</p> <p>85% of this reduction refers to avoidable FW; avoidable FW thus reduced by 21-24%.</p> | <p>Embodied impacts of food that is no longer wasted. For GHGs: based on entire LC, incl. preparation in the home and waste treatment and disposal. For land use: hectares required to produce food commodity, as found in literature</p> <p>Prevention of 3.4 million tonnes of GHG emissions a year; 1 billion m<sup>3</sup> of water saved; avoided use of 430000 ha of land per yr for food production.</p> | <p>Based on: costs of the campaign + avoided disposal costs for local authorities + savings for households in terms of avoiding throwing away food (based on retail prices)</p> <p>Campaign costs: £26 million over 5 yrs (expenditures by WRAP, local authorities, Courtauld Commitment signatories and community groups)</p> <p>Savings over 5 yrs: £86 million for local authorities (avoided FW disposal) + £6.5 billion for households (avoided purchase of food)</p> |
| <p><b>EFFICIENCY:</b> benefit-cost ratio; money spent versus money saved. There is an implicit link to amounts of FW reduced as the savings refer to the embodied economic retail value of food that is no longer wasted and the avoided disposal costs; no link to ecological savings.</p> |                                         |                                     |                                       |                                                                                                                                                                                            |                                                                                                                                                                                                                                                                                                                                                                                                                 |                                                                                                                                                                                                                                                                                                                                                                                                                                                                            |
| <p>Every £1 spent by the public and private sector contributed to over £250 of savings.</p>                                                                                                                                                                                                 |                                         |                                     |                                       |                                                                                                                                                                                            |                                                                                                                                                                                                                                                                                                                                                                                                                 |                                                                                                                                                                                                                                                                                                                                                                                                                                                                            |
| <ul style="list-style-type: none"> <li>---- 6 months “Love Food Hate Waste (LFHW)” campaign in West London</li> </ul>                                                                                                                                                                       | (WRAP, 2015)                            | Households                          | UK, sub-region (West London), society | +/- 15% reduction for total household food waste                                                                                                                                           |                                                                                                                                                                                                                                                                                                                                                                                                                 | <p>Based on: costs of the campaign + avoided disposal costs for local authorities + savings for households in terms of avoiding throwing away food (based on retail prices)</p> <p>Campaign cost: ca £170,000, (US \$270,000)<br/>Local authorities save £1.3 million (US \$2.1 million); residents save around £14 million (US \$22 million).</p>                                                                                                                         |
| <p><b>EFFICIENCY:</b> benefit-cost ratio; money spent versus money saved. There is an implicit link to amounts of FW reduced as the savings refer to the embodied economic retail value of food that is no longer wasted and the avoided disposal costs; no link to ecological savings.</p> |                                         |                                     |                                       |                                                                                                                                                                                            |                                                                                                                                                                                                                                                                                                                                                                                                                 |                                                                                                                                                                                                                                                                                                                                                                                                                                                                            |
| <p>Every £1 (US\$1.6) invested = saving around £90 (US\$140) for consumers and local authorities.</p>                                                                                                                                                                                       |                                         |                                     |                                       |                                                                                                                                                                                            |                                                                                                                                                                                                                                                                                                                                                                                                                 |                                                                                                                                                                                                                                                                                                                                                                                                                                                                            |

| Measure                                                                                                                                                                                                                                                                                                                                                                                                                                                                                                                                                                                                      | Source                      | LC stage or sector in focus              | Location & Scale                                        | Effectiveness                                                                                                    | Environmental impacts or savings                                                                                                                                                          | Economic costs and benefits<br>Social impacts                                                                                                                                                                                                                           |
|--------------------------------------------------------------------------------------------------------------------------------------------------------------------------------------------------------------------------------------------------------------------------------------------------------------------------------------------------------------------------------------------------------------------------------------------------------------------------------------------------------------------------------------------------------------------------------------------------------------|-----------------------------|------------------------------------------|---------------------------------------------------------|------------------------------------------------------------------------------------------------------------------|-------------------------------------------------------------------------------------------------------------------------------------------------------------------------------------------|-------------------------------------------------------------------------------------------------------------------------------------------------------------------------------------------------------------------------------------------------------------------------|
| <ul style="list-style-type: none"> <li>Courtauld Commitment, Voluntary agreement</li> <li>Phase 1 (2005-2010): household food and packaging waste</li> <li>Measures mainly focus on improving/reducing packaging (waste), complemented with extended shelf life thus reducing food waste; setting of clear targets.</li> </ul>                                                                                                                                                                                                                                                                               | (WRAP, 2010a, 2013a, 2013d) | Households                               | UK, society                                             | 1.2 million tonnes of food and packaging waste                                                                   | <p>Embodied GHGs of foods no longer wasted + avoided disposal impacts</p> <p>Savings: 3.3 million tonnes of CO<sub>2</sub>eq</p>                                                          | <p>Value of food no longer being wasted (based on retail value) + avoided landfilling costs. Not clear if campaign or agreement costs are included</p> <p>Savings: £1.8 billion</p>                                                                                     |
| <ul style="list-style-type: none"> <li>Courtauld Commitment, Voluntary agreement</li> <li>Phase 2 (2009/2010-2012): focus on packaging waste, and household &amp; supply chain FW</li> <li>Example measures:<br/>*HOUSEHOLDS - setting of clear targets; communication campaigns (e.g. Love Food Hate Waste campaign); community engagement and support; design changes to products, packaging and labelling.<br/>*SUPPLY CHAIN - setting of clear targets; improved forecasting; innovative packaging to increase shelf life...<br/>WRAP provides guidance, tools, expert knowledge and support.</li> </ul> | (WRAP, 2013a, 2013d)        | Supply chain, grocery sector, households | UK, society and business level; 53 business signatories | <p>Cumulative waste avoided (2009-2012):</p> <p>Household FW: 700 000 t</p> <p>Supply chain FW: +/- 300 000t</p> | <p>Embodied GHGs of foods no longer wasted + avoided disposal impacts</p> <p>Cumulative CO<sub>2</sub> eq savings (2009-2012): Household FW: 2 300 000 t; Supply chain FW: 1 100 000t</p> | <p>Value of food no longer being wasted (based on retail value) + avoided landfilling costs. Not clear if campaign or agreement costs are included</p> <p>Cumulative cost savings (2009-2012):<br/>Household FW: £ 1 710 000 000<br/>Supply chain FW: £ 170 000 000</p> |

| Measure                                                                                                                                                                                                                | Source                                         | LC stage or sector in focus | Location & Scale        | Effectiveness                                                                                       | Environmental impacts or savings                                                                                                                                              | Economic costs and benefits<br>Social impacts                                                                                                                                                                                                                                     |
|------------------------------------------------------------------------------------------------------------------------------------------------------------------------------------------------------------------------|------------------------------------------------|-----------------------------|-------------------------|-----------------------------------------------------------------------------------------------------|-------------------------------------------------------------------------------------------------------------------------------------------------------------------------------|-----------------------------------------------------------------------------------------------------------------------------------------------------------------------------------------------------------------------------------------------------------------------------------|
| ○ Novel portion packs for fresh meat                                                                                                                                                                                   | (WRAP, 2015)                                   | Households                  | UK, society             | Could lead to a 5-10% reduction in waste                                                            | No methodology given; therefore not clear if EoL impacts or packaging impacts were considered.<br>2-4-fold environmental benefit of the small amount of additional packaging. | Additional packaging costs<br><br>Additional packaging costs = 0.5% - 1% of current packaging costs                                                                                                                                                                               |
| ● Campaign “Food: Too Good to Waste (FTGTW)”: behaviour change strategies & tools, messaging and outreach tools.<br>Example measures: tools and guidance for better storage and smart shopping; posters and workshops. | (EPA, 2016)                                    | Households                  | US, society             | Avoidable FW: weight reduction ranging from -11 to -48%; volume reduction ranging from -27 to -39%. | Could not be estimated                                                                                                                                                        | Implementation costs for campaigns<br><br>Implementation costs for campaigns ranged from a few thousand dollars for pilots to above \$100,000, not including staff time, for broad scale campaigns                                                                                |
| ● BinCam system: waste bin capturing and sharing images of disposed waste on an online social network                                                                                                                  | (Thieme et al., 2012; Comber and Thieme, 2013) | Households                  | US, 4 shared households | No absolute data on FW reduction available; relative data only visualised: see economic costs.      | /                                                                                                                                                                             | Participants received visualisations to see how they performed relative to the other households: visualisation included “gold bars” representing the money saved by wasting less; no % changes given or absolute data given.<br>Focus on awareness raising and social influences. |
| ● Written messages in student dining hall reminding diners to “eat what you take”                                                                                                                                      | (Whitehair et al., 2013)                       | OoH, university dining      | US, 1 mensa             | 15% reduction in food waste BUT potentially biased results (Ellison, 2017)                          |                                                                                                                                                                               |                                                                                                                                                                                                                                                                                   |



| Measure                                                                                                                                                                                                          | Source                                                 | LC stage or sector in focus | Location & Scale          | Effectiveness                                                                                                                                                                          | Environmental impacts or savings                                                                                                                                      | Economic costs and benefits<br>Social impacts                                                                      |
|------------------------------------------------------------------------------------------------------------------------------------------------------------------------------------------------------------------|--------------------------------------------------------|-----------------------------|---------------------------|----------------------------------------------------------------------------------------------------------------------------------------------------------------------------------------|-----------------------------------------------------------------------------------------------------------------------------------------------------------------------|--------------------------------------------------------------------------------------------------------------------|
| <ul style="list-style-type: none"> <li>Using 2nd grade vegetables in commercial kitchens</li> <li>Focus on carrots, onions and leeks.</li> </ul>                                                                 | (Teuber and Jensen, 2016)<br>Based on (Lynnerup, 2016) | OoH                         | DK, 8 industrial kitchens | More kitchen FW (trimming losses) for leeks and carrots; less for onions.<br>No information on FW reductions at supplier level                                                         |                                                                                                                                                                       | Based on price of raw products (rescaled to 10 kg vegetable weight after trimming) and time spent for trimming.    |
| <b>EFFICIENCY:</b> net benefits calculated as benefits minus costs – see “Econ. Costs and benefits” section                                                                                                      |                                                        |                             |                           |                                                                                                                                                                                        |                                                                                                                                                                       |                                                                                                                    |
| Important are: working time spent, purchasing price, utilisation rate (trimming losses) and application. Onions= economic advantage in using 2nd grade; Leeks = moderate advantage; Carrots= almost no advantage |                                                        |                             |                           |                                                                                                                                                                                        |                                                                                                                                                                       |                                                                                                                    |
| <ul style="list-style-type: none"> <li>Reduce amounts of food being ordered or prepared; change menus (more child friendly), reduce continuous availability of food on the buffet</li> </ul>                     | (Schmidt et al., 2018)                                 | OoH, schools                | DE, several schools       | FW reductions: 14 to 48%. Small measures lead to +/- 30% short term reductions<br><br>Implementing small measures in the 4 schools under study would lead to +/- 5800 kg FW reductions | Embodied life cycle impacts; EoL stage not included.<br><br>Implementing small measures in the 4 schools under study would lead to 8.7 tonnes CO <sub>2</sub> savings | Based on economic value of food no longer wasted.<br><br>Savings: between 7 000 and 13 000 EUR per year per school |
| <b>EFFICIENCY:</b> For a selection of measures, a qualitative indication is made on the estimated time, labour and costs that go with each measure as well as staff willingness to implement the measure.        |                                                        |                             |                           |                                                                                                                                                                                        |                                                                                                                                                                       |                                                                                                                    |
| Expenses, costs or willingness are rated as being “low”, “average” or “high” (see fig.22 of original report)                                                                                                     |                                                        |                             |                           |                                                                                                                                                                                        |                                                                                                                                                                       |                                                                                                                    |

| Measure                                                                                                                                                                                                                                                                                      | Source                 | LC stage or sector in focus | Location & Scale                       | Effectiveness                                                                                                                                                                                                                                                                                                           | Environmental impacts or savings | Economic costs and benefits<br>Social impacts                                                                                                                                                                                                                                                                                                                                                                                                                                                                                                                                                                                                                                                                                                                                                                                                                                                                                                                                                                                                                                                                                                                                                                                                                                                                                                                                                 |
|----------------------------------------------------------------------------------------------------------------------------------------------------------------------------------------------------------------------------------------------------------------------------------------------|------------------------|-----------------------------|----------------------------------------|-------------------------------------------------------------------------------------------------------------------------------------------------------------------------------------------------------------------------------------------------------------------------------------------------------------------------|----------------------------------|-----------------------------------------------------------------------------------------------------------------------------------------------------------------------------------------------------------------------------------------------------------------------------------------------------------------------------------------------------------------------------------------------------------------------------------------------------------------------------------------------------------------------------------------------------------------------------------------------------------------------------------------------------------------------------------------------------------------------------------------------------------------------------------------------------------------------------------------------------------------------------------------------------------------------------------------------------------------------------------------------------------------------------------------------------------------------------------------------------------------------------------------------------------------------------------------------------------------------------------------------------------------------------------------------------------------------------------------------------------------------------------------------|
| <ul style="list-style-type: none"> <li>The business case for hotels: measure FW, engage staff, rethink the buffet, reduce food overproduction, and repurpose excess food.</li> </ul> <p>Case studies given focus on: smart scale, rethink buffet and reduce overproduction, engage staff</p> | (Clowes et al., 2018b) | OoH, hotels                 | Global, 42 hotel sites in 15 countries | <p>FW generated in kitchen (incl. inedible parts) during preparation and storage, incl. leftovers thrown by staff. Incl. buffet returns. Excl. rescued food (donated) or customer plate leftovers.</p> <p>On average: 21 % FW reduction over 12 months (managers mainly focusing on reducing FW of costly products)</p> |                                  | <p><b>Costs:</b> measuring FW (smart scales), identify required actions, implem. costs (consulting, equipment, staff training ...), redesign menus;<br/><b>Benefits:</b> lower costs &amp; addit. revenue (optimization food/raw material purchase, fewer waste collection, selling food that otherwise would have been unsold...).</p> <p><b>Monetary value of FW; FW as share of cost of goods sold (COGS)</b> = share of FW in total food expenditure; investments made</p> <p><b>Monetary value FW:</b> average reduction of 64%; <b>FW as share of COGS:</b> average nearly 4% drop; median over 2% drop. Thus half of the sites saved more than 2 cents on every dollar of COGS; <b>Investments made:</b> nearly 90% of the sites invested fewer as \$20,000 over 3 yrs; on average, only 0.9 % of annual food sales.</p> <hr/> <p><b>EFFICIENCY:</b> Benefit-cost ratio and Return on investment (ROI). Investments pay-back period (recoup of investment after x yrs). Time period: 3 yr; discount rate: 10% per yr. There is an implicit link to amounts of FW reduced as benefits include changes in food purchase costs; no link to ecological savings.</p> <hr/> <p><b>Benefit-cost ratio:</b> Average 7:1. Median nearly 5:1 (for every \$1 spent, half of the sites realized nearly \$5 return; nearly 400% ROI). <b>Payback period:</b> 70% within 1 yr; 95% within 2 yrs.</p> |

| Measure                                                                                                                                                                                                                                                                                                              | Source                 | LC stage or sector in focus | Location & Scale                       | Effectiveness                                                                                                                                                                                                                                               | Environmental impacts or savings | Economic costs and benefits<br>Social impacts                                                                                                                                                                                                                                                                                                                                                                                                                                                                                                                                                                                                                                                                                                                                                                                                                                                                                                                                                                                                                                                                                                                                                                                                                                                                                                                                 |
|----------------------------------------------------------------------------------------------------------------------------------------------------------------------------------------------------------------------------------------------------------------------------------------------------------------------|------------------------|-----------------------------|----------------------------------------|-------------------------------------------------------------------------------------------------------------------------------------------------------------------------------------------------------------------------------------------------------------|----------------------------------|-------------------------------------------------------------------------------------------------------------------------------------------------------------------------------------------------------------------------------------------------------------------------------------------------------------------------------------------------------------------------------------------------------------------------------------------------------------------------------------------------------------------------------------------------------------------------------------------------------------------------------------------------------------------------------------------------------------------------------------------------------------------------------------------------------------------------------------------------------------------------------------------------------------------------------------------------------------------------------------------------------------------------------------------------------------------------------------------------------------------------------------------------------------------------------------------------------------------------------------------------------------------------------------------------------------------------------------------------------------------------------|
| <ul style="list-style-type: none"> <li>The business case for catering: measure FW, engage staff, start small and get creative, reduce overproduction, and repurpose excess food.</li> </ul> <p>Case studies given focus on: measure FW, collaborate with non-profits, start small and get creative, engage staff</p> | (Clowes et al., 2018a) | OoH, catering               | Global, 86 catering sites, 6 countries | <p>FW generated in kitchen (incl. inedible parts) during preparation and storage, incl. leftovers thrown by staff. Excl. rescued food (donated) or customer plate leftovers.</p> <p>Average FW weight reduction of 36% over 1 year, or 44% over 3 years</p> |                                  | <p><b>Costs:</b> measuring FW (smart scales), identify required actions, implem. costs (consulting, equipment, staff training ...), redesign menus; <b>Benefits:</b> lower costs &amp; addit. revenue (optimization food/raw material purchase, fewer waste collection, selling food that otherwise would have been unsold...).</p> <p><b>Monetary value of FW; FW as share of cost of goods sold (COGS)</b> = share of FW in total food expenditure; investments made</p> <p><b>Monetary value FW:</b> average reduction of 56%; <b>FW as share of COGS:</b> average site saved more than 5 cents on every \$1 of COGS; half of the sites saved over 4 cents; <b>Investments made over 3 yrs:</b> 79% invested fewer as \$10,000; 98% below \$15,000. On average, 1.6% of annual food sales.</p> <hr/> <p><b><u>EFFICIENCY:</u></b> Benefit-cost ratio and Return on investment (ROI). Investments pay-back period (recoup of investment after x yrs). Time period: 3 yr; discount rate: 10% per yr. There is an implicit link to amounts of FW reduced as benefits include changes in food purchase costs; no link to ecological savings.</p> <hr/> <p><b>Benefit-cost ratio:</b> Average over 6:1. Median over 4:1 (for every \$1 spent, half of the sites realized a \$4 return or greater; over 300% ROI). <b>Payback period:</b> 64% within 1 yr; 80% within 2 yrs.</p> |

| Measure                                                                                                                                                                                                                                                                                                                                               | Source                                             | LC stage or sector in focus | Location & Scale                      | Effectiveness                                                                                                                                                                                                                                                                                                            | Environmental impacts or savings | Economic costs and benefits<br>Social impacts                                                                                                                                                                                                                                                                                                                                                                                                                                                                                                                                                                                                                                                                                                                                                                                                                                                                                                                                                                                                                                                                                                                                                                                                                                                                                                                                                    |
|-------------------------------------------------------------------------------------------------------------------------------------------------------------------------------------------------------------------------------------------------------------------------------------------------------------------------------------------------------|----------------------------------------------------|-----------------------------|---------------------------------------|--------------------------------------------------------------------------------------------------------------------------------------------------------------------------------------------------------------------------------------------------------------------------------------------------------------------------|----------------------------------|--------------------------------------------------------------------------------------------------------------------------------------------------------------------------------------------------------------------------------------------------------------------------------------------------------------------------------------------------------------------------------------------------------------------------------------------------------------------------------------------------------------------------------------------------------------------------------------------------------------------------------------------------------------------------------------------------------------------------------------------------------------------------------------------------------------------------------------------------------------------------------------------------------------------------------------------------------------------------------------------------------------------------------------------------------------------------------------------------------------------------------------------------------------------------------------------------------------------------------------------------------------------------------------------------------------------------------------------------------------------------------------------------|
| <ul style="list-style-type: none"> <li>The business case for restaurants: measure FW, engage staff, reduce overproduction, rethink inventory and purchasing practices, and repurpose excess food.</li> </ul> <p>Case studies given focus on: manual and digital measurement of FW, start small (gradual implementation of measures), engage staff</p> | (Clowes et al., 2019)                              | OoH, restaurants            | Global, 114 restaurants, 12 countries | <p>FW generated in kitchen (incl. inedible parts) during preparation and storage, incl. leftovers thrown by staff. Excl. rescued food (donated) or customer plate leftovers.</p> <p>Average FW weight reduction of 26% over 1 year, or 58% over 3 years (managers mainly focusing on reducing FW of costly products)</p> |                                  | <p><b>Costs:</b> measuring FW (smart scales), identify required actions, implem. costs (consulting, equipment, staff training ...), redesign menus;<br/><b>Benefits:</b> lower costs &amp; addit. revenue (optimization food/raw material purchase, fewer waste collection, selling food that otherwise would have been unsold...).</p> <p><b>Monetary value of FW; FW as share of cost of goods sold (COGS)</b> = share of FW in total food expenditure; investments made</p> <p><b>Monetary value FW:</b> average reduction of 61%; <b>FW as share of COGS:</b> average site saved more than 2 cents on every \$1 of COGS; half of the sites saved 2 cents; <b>Investments made over 3 yrs:</b> between \$10,000 and \$20,000. On average, 0.4% of annual food sales.</p> <hr/> <p><b>EFFICIENCY:</b> Benefit-cost ratio and Return on investment (ROI). Investments pay-back period (recoup of investment after x yrs). Time period: 3 yr; discount rate: 10% per yr. There is an implicit link to amounts of FW reduced as benefits include changes in food purchase costs; no link to ecological savings.</p> <p><b>Benefit-cost ratio:</b> 89% of sites had a net positive financial return (&gt;1:1). Average and median both 7:1 (for every \$1 spent, half of the sites realized a \$6 return or greater; over 600% ROI). <b>Payback period:</b> 76% within 1 yr; 89% within 2 yrs.</p> |
| <ul style="list-style-type: none"> <li>Mobile catering in hospitals</li> </ul>                                                                                                                                                                                                                                                                        | (Snels and Wassenaar, 2011; Kranert et al., 2012a) | OoH, care                   | NL, 1 hospital                        | Only 2,2% of prepared meals ends up as FW (before, it was 36-48%)                                                                                                                                                                                                                                                        |                                  | <p><b>Cost savings (from food and personnel savings)</b></p> <p>Savings: about €1,1 millions</p>                                                                                                                                                                                                                                                                                                                                                                                                                                                                                                                                                                                                                                                                                                                                                                                                                                                                                                                                                                                                                                                                                                                                                                                                                                                                                                 |
| <ul style="list-style-type: none"> <li>Trayless system in a buffet-style university dining hall</li> </ul>                                                                                                                                                                                                                                            | (Thiagarajah and Getty, 2013)                      | OoH, university dining      | US, 1 mensa                           | FW reduction of 18,4% for solid food; 6,8 % decrease for liquid waste                                                                                                                                                                                                                                                    |                                  |                                                                                                                                                                                                                                                                                                                                                                                                                                                                                                                                                                                                                                                                                                                                                                                                                                                                                                                                                                                                                                                                                                                                                                                                                                                                                                                                                                                                  |

| Measure                                                                                                                                                                                                                   | Source                       | LC stage or sector in focus | Location & Scale                                         | Effectiveness                                                                                          | Environmental impacts or savings                                                                                                                    | Economic costs and benefits<br>Social impacts                                                                                                                                                                                                                                                                                     |
|---------------------------------------------------------------------------------------------------------------------------------------------------------------------------------------------------------------------------|------------------------------|-----------------------------|----------------------------------------------------------|--------------------------------------------------------------------------------------------------------|-----------------------------------------------------------------------------------------------------------------------------------------------------|-----------------------------------------------------------------------------------------------------------------------------------------------------------------------------------------------------------------------------------------------------------------------------------------------------------------------------------|
| <ul style="list-style-type: none"> <li>University dining hall: education campaign informing diners on FW issues, “Every plate counts” and on FW reduction activities taken up by the dining hall (eg donation)</li> </ul> | (Ellison et al., 2017)       | OoH, university dining      | US, 2 mensas                                             | No significant FW reduction observed                                                                   |                                                                                                                                                     |                                                                                                                                                                                                                                                                                                                                   |
| <ul style="list-style-type: none"> <li>Smart scale - Tracking FW with LEANPATH Case study: Intel’s corporate cafeterias (US, April 2009-April 2010)</li> </ul>                                                            | (City of Hillsboro, 2010)    | OoH, business cafeteria     | US, 2 cafeterias                                         | pre-consumer food waste cut by 47%                                                                     | <p>Embodied GHG emissions for a selection of 7 food products + avoided disposal impacts</p> <p>GHG reduction of appr. 100 tonnes CO<sub>2</sub></p> | <p>Based on food purchasing prices. No detailed calculations available for implem. costs such as time spent for measuring FW but it was taking into account.</p> <p>Food costs per meal reduced by 13,2%. Time spent for weighting FW (4 min. per week per employee) was offset by time savings from avoiding overproduction.</p> |
| <ul style="list-style-type: none"> <li>Smart scale – RESOURCE MANAGERFOOD + smaller portions on buffet, changes in buffet refilling, staff awareness</li> </ul>                                                           | (Leverenz et al., 2016)      | OoH, hotel                  | DE, 1 hotel                                              | After 5 months: 85% reduction in FW at breakfast buffet                                                |                                                                                                                                                     | <p>Based on purchasing price of foods no longer wasted</p> <p>Along entire project (9 months): savings of 6840 EUR</p>                                                                                                                                                                                                            |
| <ul style="list-style-type: none"> <li>Smart scale WINNOW<sup>2</sup> (1) Since March 2017: Ikea Amersfoort, NL (2) Since Febr 2017: Ikea Gent, BE</li> </ul>                                                             | (Winnow, 2018a, 2018b)       | OoH, restaurant             | BE & NL, business                                        | <p>(1) 40% FW reduction; over 15000 meals saved</p> <p>(2) 22% FW reduction; over 4000 meals saved</p> | <p>Embodied CO<sub>2</sub> impacts of food; not clear if EoL was included</p> <p>(1) not given<br/>(2) avoiding 7,894 tonnes of CO<sub>2</sub></p>  | <p>Based on food purchasing costs.</p> <p>(1) annual saving of €102,000 (estimated)<br/>(2) saving over €21,000 annually</p>                                                                                                                                                                                                      |
| <ul style="list-style-type: none"> <li>Nudges: reduce plate size and put signs at buffet</li> </ul>                                                                                                                       | (Kallbekken and Sælen, 2013) | OoH, hotels                 | NO, 14 hotels (7 per nudge) + 38 hotels in control group | FW reduction 19,5% for plate size and 20,5% for sign                                                   |                                                                                                                                                     |                                                                                                                                                                                                                                                                                                                                   |

<sup>2</sup> Various case studies at <https://www.winnowsolutions.com/en/casestudies>

| Measure                                                                                                                                             | Source                           | LC stage or sector in focus                | Location & Scale                                                         | Effectiveness                                                                                                                                                               | Environmental impacts or savings                                                                                                                                                                                            | Economic costs and benefits<br>Social impacts                                                                                                          |
|-----------------------------------------------------------------------------------------------------------------------------------------------------|----------------------------------|--------------------------------------------|--------------------------------------------------------------------------|-----------------------------------------------------------------------------------------------------------------------------------------------------------------------------|-----------------------------------------------------------------------------------------------------------------------------------------------------------------------------------------------------------------------------|--------------------------------------------------------------------------------------------------------------------------------------------------------|
| • Nudges: smaller plate size at buffet                                                                                                              | (Wansink and van Ittersum, 2013) | OoH, restaurant                            | US, 43 guests in 1 restaurant                                            | Diners with larger plates wasted 14.4% of food taken; diners with smaller plates 7.9%                                                                                       | /                                                                                                                                                                                                                           | /                                                                                                                                                      |
| • Use of disposable vs. permanent plates                                                                                                            | (Williams et al., 2016)          | OoH, lab test + school & university buffet | USA, 2 lab tests + 3 field tests (buffet lunch at school and university) | Permanent plates lead to less FW than disposable ones (detailed data for each of the 5 tests is given in the original source).                                              |                                                                                                                                                                                                                             |                                                                                                                                                        |
| • Informational and normative prompts in restaurants<br><br>Encourage guests to ask for take-away boxes for leftover pizza through sign on table    | (Stöckli et al., 2018)           | OoH, restaurant                            | SWI, business                                                            | No signs: 75% of diners left leftovers (25% asked for take-away boxes) 45% left the leftovers with informational prompt; 36% left leftovers with inform. & normative prompt | Not evaluated                                                                                                                                                                                                               | Not evaluated                                                                                                                                          |
| ○ Reduce plate waste by:<br>A) bread on demand<br>B) bulk meal delivery<br>C) choice of portion size<br>D) menu options<br>E) quicker status update | (Dias-Ferreira et al., 2015)     | OoH, hospital                              | PT, 1 hospital (8000 meals)                                              | Before measure: 953 g FW pp/d<br>Annual estimated reductions:<br>A) 14t, B) 32t, C) 48t, D) 8t, E) 4t                                                                       | Embodied CO <sub>2</sub> impacts of food; incl. EoL stage. Based on literature data of 1.9 t CO <sub>2</sub> per t of FW (Monier et al., 2010)<br><br>Annual CO <sub>2</sub> savings: A) 26t, B) 61t, C) 92t, D) 15t, E) 8t | Cost = 4.08 EUR per kg of FW. Based on food prices in PT and disposal costs.<br><br>Annual savings in 1000 EUR:<br>A) 56, B) 131, C) 197, D) 33, E) 18 |
| • Improved meal presentation                                                                                                                        | (Navarro et al., 2016)           | OoH, hospital                              | IL, 1 hospital, 206 patients (1/2 control group)                         | Plate leftovers reduced by 19%                                                                                                                                              |                                                                                                                                                                                                                             |                                                                                                                                                        |

| Measure                                                                                                                                                                                                                                                                                                                                                                                                                                                                                         | Source                    | LC stage or sector in focus | Location & Scale         | Effectiveness                                                                                                                                                                                                                                                                                                         | Environmental impacts or savings                                                                                                                                                                                                                                                                                                                                                                                                                                                                                                                  | Economic costs and benefits<br>Social impacts                                                                                                                                                                                                                                                                                                                                                                                                                                                                                                                                                                                                                                                                                                                                                                                                                                                                                                                                                                                     |
|-------------------------------------------------------------------------------------------------------------------------------------------------------------------------------------------------------------------------------------------------------------------------------------------------------------------------------------------------------------------------------------------------------------------------------------------------------------------------------------------------|---------------------------|-----------------------------|--------------------------|-----------------------------------------------------------------------------------------------------------------------------------------------------------------------------------------------------------------------------------------------------------------------------------------------------------------------|---------------------------------------------------------------------------------------------------------------------------------------------------------------------------------------------------------------------------------------------------------------------------------------------------------------------------------------------------------------------------------------------------------------------------------------------------------------------------------------------------------------------------------------------------|-----------------------------------------------------------------------------------------------------------------------------------------------------------------------------------------------------------------------------------------------------------------------------------------------------------------------------------------------------------------------------------------------------------------------------------------------------------------------------------------------------------------------------------------------------------------------------------------------------------------------------------------------------------------------------------------------------------------------------------------------------------------------------------------------------------------------------------------------------------------------------------------------------------------------------------------------------------------------------------------------------------------------------------|
| <ul style="list-style-type: none"> <li>Redistribution of food fit for consumption to charity</li> </ul>                                                                                                                                                                                                                                                                                                                                                                                         | (Cicatiello et al., 2016) | retail                      | IT, 1 supermarket        | 23,5 ton recovered in 2012 (over 300d) of which 17t was bread. Daily FW average of 80kg.                                                                                                                                                                                                                              | <p>Impacts based on the water and the ecological footprint of the redistributed food</p> <p>Results given for bread (WF 27545 m<sup>3</sup>; EF 8,6 gha) and meat (WF 30294 m<sup>3</sup>; EF 30,9 gha)</p>                                                                                                                                                                                                                                                                                                                                       | <p>ECON: based on econ value of food saved; investments made<br/>SOC: amount of meals recovered</p> <p>ECON: €46 000 value of recovered food; investment of €10 000 (by Town council) to monitor recovery &amp; collect related data, to purchase required materials, to provide external assistance to fulfil bureaucratic requirements</p> <p>SOC: 12 full meals/day (3624 meals over 302 d); 73 dessert portions/day; &gt; 100 bread portions/day</p>                                                                                                                                                                                                                                                                                                                                                                                                                                                                                                                                                                          |
| <p><b>EFFICIENCY: cost-revenue analysis</b><br/>Investment (€10 000) versus return (€46 000), thus producing a multiplier effect of about 4.5</p>                                                                                                                                                                                                                                                                                                                                               |                           |                             |                          |                                                                                                                                                                                                                                                                                                                       |                                                                                                                                                                                                                                                                                                                                                                                                                                                                                                                                                   |                                                                                                                                                                                                                                                                                                                                                                                                                                                                                                                                                                                                                                                                                                                                                                                                                                                                                                                                                                                                                                   |
| <ul style="list-style-type: none"> <li>REFED roadmap with 12 avoidance and 7 donation/redistribution measures, as well as 8 recycling measures (out of scope of this paper)</li> </ul> <p>Example measures: consumer education, waste tracking, trayless dining, packaging adjustments, cold chain management, donation transportation, ...</p> <p><i>Each of the measures has been evaluated separately. Overview of all solutions considered and detailed results, see (ReFED, 2016b)</i></p> | (ReFED, 2016a)            | Entire food chain           | US, society and business | <p>20% FW reduction</p> <p>Diversion potential of the solutions: 13 million t/yr</p> <ul style="list-style-type: none"> <li>Prevention: 2.6 million t/yr</li> <li>Redistribution: 1.1 million t/yr</li> <li>Recycling: 9.5 million t/yr</li> </ul> <p>SEE PIE CHARTS showing diversion potential for each measure</p> | <p>Diverted impacts based on embodied GHG emissions and water footprint (per product group; from literature) + avoided landfilling impacts (0,355 kg CO<sub>2</sub> per pound)</p> <p>For recycling: addit. CO<sub>2</sub> emissions depending on recycling solution (from literature, see Fig 24 in REFED report)</p> <p>Projections (per year): water savings of 1.6 trillion gallons (1.5% of annual U.S. freshwater withdrawals); avoid nearly 18 million tons of GHG emissions (societal value of \$200 million to \$1 billion per year)</p> | <p>ECON value of a solution: business profit potential based on financial benefits (incl. food costs avoided &amp; revenue generated) and costs (incl. initial capital expenditures &amp; annual operating expenses). Avoided costs from avoided disposal: only considered for the recycling/recovery solutions. Time frame 10 yr, 4 % discount rate.</p> <p>Value of FW: prevented = based on prices in retail (\$2,5 per pound) or wholesale (\$1-1,25 per pound); donated = \$1.71 per pound; or recycled = value of resulting compost, energy, or feed.</p> <p>Required investments: \$18 billion<br/>ECON projections (per year): Consumers savings \$5.6 billion; Business Profit Potential : \$1.9 billion (of which over \$1.6 billion restaurants &amp; food service providers).</p> <p>SOC: Meals saved and jobs created (only assessed for donation &amp; recycling measures)<br/>SOC projections: 15,000 new jobs (recycling, donation storage &amp; distribution ...); doubling recovery up to 1.8 billion meals</p> |



| Measure                                                                                                                                                                                                                                                                                                                                                                                                                                                                                                                                                                                                                                                                                                                                            | Source              | LC stage or sector in focus                                        | Location & Scale | Effectiveness                                                                                                                                                                     | Environmental impacts or savings                                                                                                                                         | Economic costs and benefits<br>Social impacts                                                                                                                                                                                                                                                                                                       |
|----------------------------------------------------------------------------------------------------------------------------------------------------------------------------------------------------------------------------------------------------------------------------------------------------------------------------------------------------------------------------------------------------------------------------------------------------------------------------------------------------------------------------------------------------------------------------------------------------------------------------------------------------------------------------------------------------------------------------------------------------|---------------------|--------------------------------------------------------------------|------------------|-----------------------------------------------------------------------------------------------------------------------------------------------------------------------------------|--------------------------------------------------------------------------------------------------------------------------------------------------------------------------|-----------------------------------------------------------------------------------------------------------------------------------------------------------------------------------------------------------------------------------------------------------------------------------------------------------------------------------------------------|
| <p><b>EFFICIENCY:</b> Expected societal economic value (net economic value = benefits-costs) over 10 yrs; MACC curves (taking into account diversion potential) and a Restaurant solution matrix (taking into account feasibility). There is an implicit link to amounts of FW reduced as the savings refer to the embodied economic retail value of food that is no longer wasted (+ changes in disposal costs in case of recycling solutions); no link to ecological savings.</p> <p>Expected societal Economic Value: \$100 billion in over a decade (&gt;75% from prevention solutions, 23% from redistribution and the remaining potential from recycling solutions); MACC curves and solution/feasibility matrices: see original report.</p> |                     |                                                                    |                  |                                                                                                                                                                                   |                                                                                                                                                                          |                                                                                                                                                                                                                                                                                                                                                     |
| <ul style="list-style-type: none"> <li>HaFs Hospitality and Food service Agreement – Voluntary agreement with combined measures</li> </ul> <p>HaFs sets clear prevention and waste management target for both food and packaging waste. WRAP provides guidance and tools to set the baseline, set up an implementation plan, take action and monitor progress.</p> <p>Case studies include measures taken in each business related to staff awareness, FW monitoring, changes in amounts of food prepared/served; better menu planning; or maximise ingredient use</p>                                                                                                                                                                             | (WRAP, 2014, 2017b) | <p>OoH</p> <p>Wide range of case studies are given (see below)</p> | UK, sector       | <p>2015 against baseline of 2012: FW reduction of 11 600 tonnes; from 360 to over 760 tonnes donated</p> <p>Over entire HaFS: avoidance of 24 000 tonnes (=48 million meals).</p> | <p>Embodied impacts of food that is no longer wasted.</p> <p>2015 against baseline of 2012: 11% reduction (&gt; 80 000 tonnes of CO2) from food and packaging waste.</p> | <p>Value of food that is no longer wasted, set at £2,775 per tonne (Source: “the true cost of food waste” (WRAP, 2013e). This price includes purchasing costs as well as disposal costs and resources &amp; time spent for preparing food. No information given on costs of campaign/agreement</p> <p>Over entire HaFS: savings of £67 million.</p> |
| <ul style="list-style-type: none"> <li>-----HaFs Case study Crieff Hydro Hotel: Monitoring, Staff awareness, Changes in breakfast serving</li> </ul>                                                                                                                                                                                                                                                                                                                                                                                                                                                                                                                                                                                               | (WRAP, 2017b)       | OoH, hotel                                                         | UK, 1 hotel      | 5% decrease in 1 <sup>st</sup> monitoring week (awareness raising of Chef)                                                                                                        |                                                                                                                                                                          | £10,000 savings from reducing toast and jam waste at breakfast                                                                                                                                                                                                                                                                                      |

| Measure                                                                                                                                                                                                                                                           | Source        | LC stage or sector in focus | Location & Scale    | Effectiveness                   | Environmental impacts or savings | Economic costs and benefits<br>Social impacts                                                                       |
|-------------------------------------------------------------------------------------------------------------------------------------------------------------------------------------------------------------------------------------------------------------------|---------------|-----------------------------|---------------------|---------------------------------|----------------------------------|---------------------------------------------------------------------------------------------------------------------|
| <ul style="list-style-type: none"> <li>-----<i>HaFs Case study</i><br/>Restaurant Associates, reducing FW during meetings: changes in amounts of food prepared, avoiding excess food, offer take-away boxes, provide wrapped biscuits</li> </ul>                  | (WRAP, 2017b) | OoH, caterer                | UK, company         | Over 4 weeks: 20 tonnes less FW |                                  | FW contribution to total food purchase costs: decrease from 39 to 18% over 4 weeks                                  |
| <ul style="list-style-type: none"> <li>-----<i>HaFs Case study</i><br/>Inspire Catering: reducing prepared food and plate waste; better menu planning to maximise use of ingredients; improving portion control and encouraging portion options.</li> </ul>       | (WRAP, 2017b) | OoH, caterer                | UK, caterer company | Annual FW savings of 5%.        |                                  |                                                                                                                     |
| <ul style="list-style-type: none"> <li>-----<i>HaFs Case study</i><br/>Baxter Storey: FW monitoring and staff training</li> </ul>                                                                                                                                 | (WRAP, 2017b) | OoH, hospitality provider   | UK, company         | FW reduction of over 35%        |                                  | Savings: over £3 million in food and beverage costs, over £1 million in disposal costs and over £350,000 in energy. |
| <ul style="list-style-type: none"> <li>-----<i>HaFs Case study</i><br/>KFC : food donation scheme<br/>Unsold chicken is packaged and frozen so it can be stored and later on collected by charity.</li> </ul>                                                     | (WRAP, 2017b) | OoH, restaurant             | UK, 100 restaurants | over 35,000 meals donated       |                                  |                                                                                                                     |
| <ul style="list-style-type: none"> <li>-----<i>HaFs Case study</i><br/>Spirit Pub Company: increased FW recycling by transforming logistics (innovative backhauling measures). Requires better FW segregation, staff training, adaptations to vehicles</li> </ul> | (WRAP, 2017b) | OoH, pub                    | UK, pub company     | Large recycling rate increase   |                                  | Financial savings of over £1.6 million                                                                              |
| <ul style="list-style-type: none"> <li>-----<i>HaFs Case study</i><br/>Dragon Hotel: increase</li> </ul>                                                                                                                                                          | (WRAP, 2017b) | OoH, hotel                  | UK, hotel           |                                 |                                  | Savings of £3,000 through simple no- or low-cost measures during 6 mnth pilot. Now: saving                          |

| Measure                                    | Source | LC stage or sector in focus | Location & Scale | Effectiveness | Environmental impacts or savings | Economic costs and benefits<br>Social impacts |
|--------------------------------------------|--------|-----------------------------|------------------|---------------|----------------------------------|-----------------------------------------------|
| recycling rate of food and packaging waste |        |                             |                  |               |                                  | around £15,000 a year.                        |

### 3 Supplementary Table S3

**Supplementary Table S3** Overview of academic and grey literature sources containing one or more evaluated measure, as a result of Step 2 of the literature search process.

| A) Peer reviewed journals                                                                                                                                                             |      |                                                                                                                                                             |                                                         |
|---------------------------------------------------------------------------------------------------------------------------------------------------------------------------------------|------|-------------------------------------------------------------------------------------------------------------------------------------------------------------|---------------------------------------------------------|
| Author(s)                                                                                                                                                                             | Year | Title                                                                                                                                                       | Journal                                                 |
| Brown, T.; Hipps, N. A.; Easteal, S.; Parry, A.; Evans, J. A.                                                                                                                         | 2014 | Reducing domestic food waste by freezing at home                                                                                                            | International Journal of Refrigeration                  |
| Brown, T.; Hipps, N. A.; Easteal, S.; Parry, A.; Evans, J. A.                                                                                                                         | 2014 | Reducing domestic food waste by lowering home refrigerator temperatures                                                                                     | International Journal of Refrigeration                  |
| Cicatiello, Clara; Franco, Silvio; Pancino, Barbara; Blasi, Emanuele                                                                                                                  | 2016 | The value of food waste: An exploratory study on retailing                                                                                                  | Journal of Retailing and Consumer Services              |
| Comber, Rob; Thieme, Anja                                                                                                                                                             | 2013 | Designing beyond habit: opening space for improved recycling and food waste behaviors through processes of persuasion, social influence and aversive affect | Pers Ubiquit Comput (Personal and Ubiquitous Computing) |
| Dias-Ferreira, C.; Santos, T.; Oliveira, V.                                                                                                                                           | 2015 | Hospital food waste and environmental and economic indicators--A Portuguese case study                                                                      | Waste management (New York, N.Y.)                       |
| Ellison, Brenna; Nehrling, Erica Whitney; Nikolaus, Cassandra J.; Duff, Brittany R.L.                                                                                                 | 2017 | Evaluation of a Food Waste Reduction Campaign in a University Dining Hall                                                                                   | Journal of Nutrition Education and Behavior             |
| Eriksson, Mattias; Strid, Ingrid; Hansson, Per-Anders                                                                                                                                 | 2016 | Food waste reduction in supermarkets – Net costs and benefits of reduced storage temperature                                                                | Resources, Conservation and Recycling                   |
| Kallbekken, Steffen; Sælen, Håkon                                                                                                                                                     | 2013 | ‘Nudging’ hotel guests to reduce food waste as a win–win environmental measure                                                                              | Economics Letters                                       |
| Navarro, Daniela Abigail; Boaz, Mona; Krause, Ilan; Elis, Avishay; Chernov, Karina; Giabra, Mursi; Levy, Miriam; Giboreau, Agnes; Kosak, Sigrid; Mouhieddine, Mohamed; Singer, Pierre | 2016 | Improved meal presentation increases food intake and decreases readmission rate in hospitalized patients                                                    | Clinical nutrition (Edinburgh, Scotland)                |
| Ribeiro, I.; Sobral, P.; Peças, P.; Henriques, E.                                                                                                                                     | 2018 | A sustainable business model to fight food waste                                                                                                            | Journal of Cleaner Production                           |
| Stöckli, Sabrina; Dorn, Michael; Liechti, Stefan                                                                                                                                      | 2018 | Normative prompts reduce consumer food waste in restaurants                                                                                                 | Waste management (New York, N.Y.)                       |
| Thiagarajah, Krisha; Getty, Victoria M.                                                                                                                                               | 2013 | Impact on plate waste of switching from a tray to a trayless delivery system in a university dining hall and employee response to the switch                | Journal of the Academy of Nutrition and Dietetics       |
| Wansink, Brian; van Ittersum, Koert                                                                                                                                                   | 2013 | Portion size me: plate-size induced consumption norms and win-win solutions for reducing food intake and waste                                              | Journal of experimental psychology: Applied             |

|                                                            |      |                                                                                      |                                                   |
|------------------------------------------------------------|------|--------------------------------------------------------------------------------------|---------------------------------------------------|
| Whitehair, Kelly J.; Shanklin, Carol W.; Brannon, Laura A. | 2013 | Written messages improve edible food waste behaviors in a university dining facility | Journal of the Academy of Nutrition and Dietetics |
| Williamson, Sara; Block, Lauren G.; Keller, Punam A.       | 2016 | Of Waste and Waists: The Effect of Plate Material on Food Consumption and Waste      | Journal of the Association for Consumer Research  |

#### B) Papers submitted to a scientific congress

| Author(s)                                                                                                 | Year | Title                                                                                                                         | Congress                                                                                                                              |
|-----------------------------------------------------------------------------------------------------------|------|-------------------------------------------------------------------------------------------------------------------------------|---------------------------------------------------------------------------------------------------------------------------------------|
| Leverenz, Dominik; Pilsl, Philipp; Hafner, Gerold                                                         | 2016 | Entwicklung einer Anwendung zur Erfassung, Bewertung und Vermeidung von Lebensmittelabfällen in gastronomischen Einrichtungen | 6. Wissenschaftskongress „Abfall- und Ressourcenwirtschaft“ 2016, Deutsche Gesellschaft für Abfallwirtschaft (DGAW) (Berlin, Germany) |
| Thieme, Anja; Comber, Rob; Miebach, Julia; Weeden, Jack; Kraemer, Nicole; Lawson, Shaun; Olivier, Patrick | 2012 | “We’ve bin watching you”-designing for reflection and social persuasion to promote sustainable lifestyles.                    | Proceedings of the 2012 ACM annual conference on Human Factors in Computing Systems - CHI '12 (Austin, Texas, USA)                    |

#### C) Reports or Grey Literature

| Author(s) or organization                                                                                                                                            | Year | Title                                                                                                                                              |
|----------------------------------------------------------------------------------------------------------------------------------------------------------------------|------|----------------------------------------------------------------------------------------------------------------------------------------------------|
| City of Hillsboro                                                                                                                                                    | 2010 | Food Waste Prevention Case Study: Intel Corporation’s Cafés                                                                                        |
| Clowes, Austin; Hanson, Craig; Swannell, Richard                                                                                                                     | 2019 | The business case for reducing food loss and waste: restaurants. A report on behalf of Champions 12.3                                              |
| Clowes, Austin; Mitchell, Peter; Hanson, Craig                                                                                                                       | 2018 | The business case for reducing food loss and waste: hotels. A report on behalf of Champions 12.3                                                   |
| Clowes, Austin; Mitchell, Peter; Hanson, Craig                                                                                                                       | 2018 | The business case for reducing food loss and waste: catering. A report on behalf of Champions 12.3                                                 |
| EPA                                                                                                                                                                  | 2016 | Food: Too Good To Waste. An Evaluation Report for the Consumption Workgroup of the West Coast Climate and Materials Management Forum               |
| Hanson, Craig; Mitchell, Peter                                                                                                                                       | 2017 | The Business Case for Reducing Food Loss and Waste. A report on behalf of Champions 12.3                                                           |
| Kranert, M.; Hafner, G.; Barabosz, Jakob; Schuller, H.; Leverenz, Dominik; Kölbig, A.; Schneider, F.; Lebersorger, S.; Scherhaufer, S.                               | 2012 | Ermittlung der weggeworfenen Lebensmittelmengen und Vorschläge zur Verminderung der Wegwerfrate bei Lebensmitteln in Deutschland                   |
| Lynnerup, Dorte                                                                                                                                                      | 2016 | Mindre madspild ved anvendelse af 2. sorterings grøntsager i storkøkkener ("Less Food Waste by using 2nd grade vegetables in industrial kitchens") |
| ReFED                                                                                                                                                                | 2016 | A Roadmap to Reduce US Food Waste by 20%                                                                                                           |
| ReFED                                                                                                                                                                | 2016 | A Roadmap to Reduce US Food Waste by 20%. Technical Appendix                                                                                       |
| Schmidt, Thomas; Baumgärtl, Sandra; Blumenthal, Antonia; Burdick, Bernhard; Claupein, Erika; Dirksmeyer, Walter; Hafner, Gerold; Koch, Franziska; Leverenz, Dominik; | 2018 | Wege zur Reduzierung von Lebensmittelabfällen - Pathways to reduce food waste (REFOVAS). Dritter Zwischenbericht zu Nr. 3.1 BNBest-BMBF 98         |

|                                                                                   |      |                                                                                                          |
|-----------------------------------------------------------------------------------|------|----------------------------------------------------------------------------------------------------------|
| Lörchner, Marianne; Ludwig-Ohm, Sabine; Waskow, Frank<br>Snels, J.; Wassenaar, N. | 2011 | Maaltijdservice Máx à la Carte. Effecten van een nieuw maaltijdconcept binnen Máxima Medisch Centrum     |
| Teuber, Ramona; Jensen, Jørgen Dejgaard                                           | 2016 | Food losses and food waste – Extent, underlying drivers and impact assessment: IFRO report               |
| Winnow                                                                            | 2018 | Case study: See how an IKEA store in Netherlands is saving over €100,000 annually by reducing food waste |
| Winnow                                                                            | 2018 | Case study: Food is Precious for IKEA Gent which plans to halve food waste by August 2020                |
| WRAP                                                                              | 2010 | Courtauld Commitment 1 (2005-2010). Case studies                                                         |
| WRAP                                                                              | 2013 | Courtauld Commitment 2 - Household Food Waste. Technical report                                          |
| WRAP                                                                              | 2013 | Impact of more effective use of the fridge and freezer                                                   |
| WRAP                                                                              | 2013 | The Courtauld Commitment, Phase 2. Final Results                                                         |
| WRAP                                                                              | 2014 | The Hospitality and Food Service Agreement. Signatory Pack Sept. 2014                                    |
| WRAP                                                                              | 2015 | Strategies to achieve economic and environmental gains by reducing food waste                            |
| WRAP                                                                              | 2017 | The Hospitality and Food Service Agreement. Taking action on waste                                       |

## REFERENCES

- Aschemann-Witzel, J., Hooge, I. de, Amani, P., Bech-Larsen, T., and Oostindjer, M. (2015). Consumer-Related Food Waste: Causes and Potential for Action. *Sustainability* 7, 6457–6477. doi: 10.3390/su7066457
- Baldwin, C., Wilberforce, N., and Kapur, A. (2011). Restaurant and food service life cycle assessment and development of a sustainability standard. *Int J Life Cycle Assess* 16, 40–49. doi: 10.1007/s11367-010-0234-x
- Betz, A., Buchli, J., Göbel, C., and Müller, C. (2015). Food waste in the Swiss food service industry - Magnitude and potential for reduction. *Waste management (New York, N.Y.)* 35, 218–226. doi: 10.1016/j.wasman.2014.09.015
- BMEL (2014). *Jedes achte Lebensmittel, das wir kaufen, werfen wir weg. Du kannst das ändern. 10 goldene Regeln, um Lebensmittelabfälle zu vermeiden.*
- BMEL (2015). *Leitfaden zur Vermeidung von Lebensmittelabfällen bei Veranstaltungen mit Verpflegung.*
- Britz, W., Dudu, H., and Ferrari, E. (2014). “Economy-wide Impacts of Food Waste Reduction: A General Equilibrium Approach,” in *Agri-Food and Rural Innovations for Healthier Societies: EAAE 2014 Congress. Ljubljana, Slovenia. 26-29 August 2014.*
- Brown, T., Hipps, N. A., Eastel, S., Parry, A., and Evans, J. A. (2014a). Reducing domestic food waste by freezing at home. *International Journal of Refrigeration* 40, 362–369. doi: 10.1016/j.ijrefrig.2013.12.009
- Brown, T., Hipps, N. A., Eastel, S., Parry, A., and Evans, J. A. (2014b). Reducing domestic food waste by lowering home refrigerator temperatures. *International Journal of Refrigeration* 40, 246–253. doi: 10.1016/j.ijrefrig.2013.11.021
- Cicatiello, C., Franco, S., Pancino, B., and Blasi, E. (2016). The value of food waste: An exploratory study on retailing. *Journal of Retailing and Consumer Services* 30, 96–104. doi: 10.1016/j.jretconser.2016.01.004
- City of Hillsboro (2010). *Food Waste Prevention Case Study: Intel Corporation’s Cafés.*
- Clowes, A., Hanson, C., and Swannell, R. (2019). *The business case for reducing food loss and waste: restaurants. A report on behalf of Champions 12.3.*
- Clowes, A., Mitchell, P., and Hanson, C. (2018a). *The business case for reducing food loss and waste: catering. A report on behalf of Champions 12.3.*



- Clowes, A., Mitchell, P., and Hanson, C. (2018b). *The business case for reducing food loss and waste: hotels. A report on behalf of Champions 12.3.*
- Comber, R., and Thieme, A. (2013). Designing beyond habit: opening space for improved recycling and food waste behaviors through processes of persuasion, social influence and aversive affect. *Pers Ubiquit Comput* 17, 1197–1210. doi: 10.1007/s00779-012-0587-1
- Dias-Ferreira, C., Santos, T., and Oliveira, V. (2015). Hospital food waste and environmental and economic indicators--A Portuguese case study. *Waste management (New York, N.Y.)* 46, 146–154. doi: 10.1016/j.wasman.2015.09.025
- Ellison, B., Nehrling, E. W., Nikolaus, C. J., and Duff, B. R.L. (2017). Evaluation of a Food Waste Reduction Campaign in a University Dining Hall. *Journal of Nutrition Education and Behavior* 49, S9-S10. doi: 10.1016/j.jneb.2017.05.032
- EPA (2016). *Food: Too Good To Waste. An Evaluation Report for the Consumption Workgroup of the West Coast Climate and Materials Management Forum.*
- Eriksson, M., Strid, I., and Hansson, P.-A. (2016). Food waste reduction in supermarkets – Net costs and benefits of reduced storage temperature. *Resources, Conservation and Recycling* 107, 73–81. doi: 10.1016/j.resconrec.2015.11.022
- FAO (2013). *Toolkit - Reducing the Food Wastage Footprint.*
- Fink, L., Roehl, R., Strassner, C., Antony, F., and Gensch, C.-O. (2016). *Vermeidung von -Lebensmittelabfällen beim Catering. Leitfaden.*
- Futouris (2019). *Reduction of food waste on cruise ships: A project report & implementation guide.*
- Göbel, C., Blumenthal, A., Niepagenkemper, L., Baumkötter, d., Teitscheid, P., and Wetter, C. (2014). *Reduktion von Warenverlusten und Warenvernichtung in der AHV - ein Beitrag zur Steigerung der Ressourceneffizienz: Bericht zum Forschungs- und Entwicklungsprojekt.*
- Göbel, C., Teitscheid, P., Ritter, G., Blumenthal, A., Friedrich, S., Frick, T., et al. (2012). *Verringerung von Lebensmittelabfällen – Identifikation von Ursachen und Handlungsoptionen in Nordrhein-Westfalen: Studie für den Runden Tisch „Neue Wertschätzung von Lebensmitteln“ des Ministeriums für Klimaschutz, Umwelt, Landwirtschaft, Natur und Verbraucherschutz des Landes Nordrhein-Westfalen.*
- Gunders, D. (2012). *Wasted - How America Is Losing Up to 40 Percent of Its Food from Farm to Fork to Landfill: NRDC Issue Paper.*
- Gustavsson, J., Cederberg, C., Sonesson, U., van Otterdijk, R., and Meybeck, A. (2011). *Global food losses and food waste. Extent, Causes and Prevention.* Rome.

- Hafner, G., Barabosz, J., Schneider, F., Lebersorger, S., Scherhauser, S., Schuller, H., et al. (2012). *Determination of discarded food and proposals for a minimization of food wastage in Germany - Abridged Version -*.
- Hanson, C., and Mitchell, P. (2017). *The Business Case for Reducing Food Loss and Waste. A report on behalf of Champions 12.3*.
- Hebrok, M., and Boks, C. (2017). Household food waste: Drivers and potential intervention points for design – An extensive review. *Journal of Cleaner Production* 151, 380–392. doi: 10.1016/j.jclepro.2017.03.069
- Hegnsholt, E., Unnikrishnan, S., Pollmann-Larsen, M., Askelsdottir, B., and Gerard, M. (2018). *Tackling the 1.6-Billion-Ton Food Loss and Waste Crisis*.
- Hermesdorf, D., Rombach, M., and Bitsch, V. (2017). Food waste reduction practices in German food retail. *British food journal (Croydon, England)* 119, 2532–2546. doi: 10.1108/BFJ-06-2017-0338
- HLPE (2014). *Food losses and waste in the context of sustainable food systems*.
- Hotrec (2017). *European Hospitality Industry guidelines to reduce food waste and recommendations to manage food donations*.
- Hrad, M., Ottner, R., Obersteiner, G., Schneider, F., and Lebersorger, S. (2015). *Vermeidung von Lebensmittelabfall in Gastronomie, Beherbergung und Großküchen*.
- iSuN (2014). *Leitfaden für Großküchen und Lieferanten - Lebensmittelverluste gemeinsam reduzieren*.
- Kallbekken, S., and Sælen, H. (2013). ‘Nudging’ hotel guests to reduce food waste as a win–win environmental measure. *Economics Letters* 119, 325–327. doi: 10.1016/j.econlet.2013.03.019
- Koester, U. (2014). Food Loss and Waste as an Economic and Policy Problem. *Intereconomics* 49, 348–354. doi: 10.1007/s10272-014-0518-7
- Kranert, M., Hafner, G., Barabosz, J., Schuller, H., Leverenz, D., Kölbig, A., et al. (2012a). *Ermittlung der weggeworfenen Lebensmittelmengen und Vorschläge zur Verminderung der Wegwerfrate bei Lebensmitteln in Deutschland: Projektförderung: Bundesanstalt für Landwirtschaft und Ernährung (BLE)*.
- Kranert, M., Hafner, G., Barabosz, J., Schuller, H., Leverenz, D., Kölbig, A., et al. (2012b). *Kurzfassung-Ermittlung der weggeworfenen Lebensmittelmengen und Vorschläge zur Verminderung der Wegwerfrate bei Lebensmitteln in Deutschland*.
- Langen, N., Göbel, C., and Waskow, F. (2015). The effectiveness of advice and actions in reducing food waste. *Proceedings of the Institution of Civil Engineers - Waste and Resource Management* 168, 72–86. doi: 10.1680/warm.13.00036

- Leanpath (2016). *A short guide to food waste management best practices*.
- Leanpath (2019). *Preventing Food Waste at the Buffet. A Guide for Chefs and Managers*.
- Leverenz, D., Pils, P., and Hafner, G. (2016). “Entwicklung einer Anwendung zur Erfassung, Bewertung und Vermeidung von Lebensmittelabfällen in gastronomischen Einrichtungen,” in 6. *Wissenschaftskongress „Abfall- und Ressourcenwirtschaft“ 2016: Berlin, Germany. 10-11 March 2016*, ed. Deutsche Gesellschaft für Abfallwirtschaft DGAW.
- Lipinski, B., Clowes, A., Goodwin, L., Hanson, C., Swannell, R., and Mitchell, P. (2017). *SDG target 12.3 on food loss and waste: 2017 progress report. An annual update on behalf of Champions 12.3*.
- Lipinski, B., Hanson, C., Lomax, J., Kitinoja, L., Waite, R., and Searchinger, T. (2013). *Reducing food loss and waste. WRI Working paper, Installment 2 of “Creating a Sustainable Food Future”*.
- Lynnerup, D. (2016). *Mindre madspild ved anvendelse af 2. sorterings grøntsager i storkøkkener: Less Food Waste by using 2nd grade vegetables in industrial kitchens*. Ministry of Environment (Miljøstyrelsen), Copenhagen, Denmark.
- Monier, V., Escalon, V., and O’Connor, C. (2010). *Preparatory study on food waste across EU 27*.
- Navarro, D. A., Boaz, M., Krause, I., Elis, A., Chernov, K., Giabra, M., et al. (2016). Improved meal presentation increases food intake and decreases readmission rate in hospitalized patients. *Clinical nutrition (Edinburgh, Scotland)* 35, 1153–1158. doi: 10.1016/j.clnu.2015.09.012
- Pirani, S. I., and Arafat, H. A. (2014). Solid waste management in the hospitality industry: A review. *Journal of environmental management* 146, 320–336. doi: 10.1016/j.jenvman.2014.07.038
- Priefer, C., Jörissen, J., and Bräutigam, K.-R. (2016). Food waste prevention in Europe – A cause-driven approach to identify the most relevant leverage points for action. *Resources, Conservation and Recycling* 109, 155–165. doi: 10.1016/j.resconrec.2016.03.004
- ReFED (2016a). *A Roadmap to Reduce US Food Waste by 20%*.
- ReFED (2016b). *A Roadmap to Reduce US Food Waste by 20%. Technical Appendix*.
- ReFED (2018). *Restaurant Food Waste Action Guide*.
- Ribeiro, I., Sobral, P., Peças, P., and Henriques, E. (2018). A sustainable business model to fight food waste. *Journal of Cleaner Production* 177, 262–275. doi: 10.1016/j.jclepro.2017.12.200
- Rutten, M., Nowicki, P., Bogaardt, M.-J., and Aramyan, L. (2013). *Reducing food waste by households and in retail in the EU – A prioritisation using economic, land use and food security impacts*.

- Sakaguchi, L., Pak, N., and Potts, M. D. (2018). Tackling the issue of food waste in restaurants: Options for measurement method, reduction and behavioral change. *Journal of Cleaner Production* 180, 430–436. doi: 10.1016/j.jclepro.2017.12.136
- Schanes, K., Dobernig, K., and Gözet, B. (2018). Food waste matters - A systematic review of household food waste practices and their policy implications. *Journal of Cleaner Production* 182, 978–991. doi: 10.1016/j.jclepro.2018.02.030
- Schmidt, T., Baumgardt, S., Blumenthal, A., Burdick, B., Claupein, E., Dirksmeyer, W., et al. (2018). *Wege zur Reduzierung von Lebensmittelabfällen - Pathways to reduce food waste (REFOWAS). Dritter Zwischenbericht zu Nr. 3.1 BNBEST-BMBF 98.*
- Silvennoinen, K., Heikkilä, L., Katajajuuri, J.-M., and Reinikainen, A. (2015). Food waste volume and origin: Case studies in the Finnish food service sector. *Waste management (New York, N.Y.)* 46, 140–145. doi: 10.1016/j.wasman.2015.09.010
- Snels, J., and Wassenaar, N. (2011). *Maaltijdservice Máx à la Carte. Effecten van een nieuw maaltijdconcept binnen Máxima Medisch Centrum.* Wageningen UR Food & Biobased Research, the Netherlands.
- SRA (2017). *How to be good #WasteWatchers.*
- Stenmarck, A., Hanssen, O. J., Silvennoinen, K., Katajajuuri, J.-M., and Werge, M. (2011). *Initiatives on prevention of food waste in the retail and wholesale trades.*
- Stöckli, S., Dorn, M., and Liechti, S. (2018). Normative prompts reduce consumer food waste in restaurants. *Waste management (New York, N.Y.)* 77, 532–536. doi: 10.1016/j.wasman.2018.04.047
- Teuber, R., and Jensen, J. D. (2016). *Food losses and food waste – Extent, underlying drivers and impact assessment: IFRO report.* Institute of Food and Resource Economics (IFRO), Copenhagen, DK.
- Thiagarajah, K., and Getty, V. M. (2013). Impact on plate waste of switching from a tray to a trayless delivery system in a university dining hall and employee response to the switch. *Journal of the Academy of Nutrition and Dietetics* 113, 141–145. doi: 10.1016/j.jand.2012.07.004
- Thieme, A., Comber, R., Miebach, J., Weeden, J., Kraemer, N., Lawson, S., et al. (2012). “‘We’ve bin watching you’-designing for reflection and social persuasion to promote sustainable lifestyles,” in *Proceedings of the 2012 ACM annual conference on Human Factors in Computing Systems - CHI '12*, eds. J. A. Konstan, E. H. Chi, and K. Höök (New York, New York, USA: ACM Press), 2337–2346.
- Wansink, B., and van Ittersum, K. (2013). Portion size me: plate-size induced consumption norms and win-win solutions for reducing food intake and waste. *Journal of experimental psychology: Applied* 19, 320–332. doi: 10.1037/a0035053

- Waskow, F., Blumenthal, A., Eberle, U., and Borstel, T. von (2016). *Situationsanalyse zu Lebensmittelverlusten im Einzelhandel, der Außer-Haus-Verpflegung sowie in privaten Haushalten und zum Verbraucherverhalten (SAVE) - Zusammenfassung.*
- Whitehair, K. J., Shanklin, C. W., and Brannon, L. A. (2013). Written messages improve edible food waste behaviors in a university dining facility. *Journal of the Academy of Nutrition and Dietetics* 113, 63–69. doi: 10.1016/j.jand.2012.09.015
- Williamson, S., Block, L. G., and Keller, P. A. (2016). Of Waste and Waists: The Effect of Plate Material on Food Consumption and Waste. *Journal of the Association for Consumer Research* 1, 147–160. doi: 10.1086/684287
- Winnow (2018a). *Case study: Food is Precious for IKEA Gent which plans to halve food waste by August 2020.*
- Winnow (2018b). *Case study: See how an IKEA store in Netherlands is saving over €100,000 annually by reducing food waste.*
- Winnow (2019). *Cost Control Guide. 12 ways to drastically cut your kitchen's costs: Mini guide to help professional kitchens handle their expenses.*
- WRAP (2006). *Packaging technologies with potential to reduce the amount of food thrown away.*
- WRAP (2007). *Survey of packaging with potential to reduce food thrown away at home.*
- WRAP (2010a). *Courtauld Commitment 1 (2005-2010). Case studies.*
- WRAP (2010b). *Reducing food waste through the chill chain: Part 1: Insights around the domestic refrigerator.*
- WRAP (2013a). *Courtauld Commitment 2 - Household Food Waste. Technical report.*
- WRAP (2013b). *Impact of more effective use of the fridge and freezer.*
- WRAP (2013c). *Overview of Waste in the UK Hospitality and Food Service Sector.*
- WRAP (2013d). *The Courtauld Commitment, Phase 2. Final Results.*
- WRAP (2013e). *The True Cost of Food Waste within Hospitality and Food Service.*
- WRAP (2013f). *Understanding out of home consumer food waste.*
- WRAP (2013g). *Where food waste arises within the UK hospitality and food service sector: spoilage, preparation and plate waste.*
- WRAP (2014). *The Hospitality and Food Service Agreement. Signatory Pack Sept. 2014.*
- WRAP (2015). *Strategies to achieve economic and environmental gains by reducing food waste.*

WRAP (2017a). *Helping Consumers Reduce Food Waste – Retail Survey 2015*.

WRAP (2017b). *The Hospitality and Food Service Agreement. Taking action on waste*.

WRAP (2018). *Taking Action on Waste (HaFS Agreement). Information sheets for the following sectors: education, hotels, restaurants, services, quick service restaurants, staff catering*.

Wunder, S., van Herpen, E., McFarland, K., Ritter, A., van Geffen, L., Stenmarck, Å., et al. (2019). *Policies against consumer food waste. Policy options for behaviour change including public campaigns: Background report contributing to “REFRESH Policy Brief: Reducing consumer food waste” (D3.4)*.

WWF (2017). *Fighting Food Waste in Hotels*.
